1           **FAST AND SIMPLE TOOL FOR THE QUANTIFICATION OF BIOFILM-EMBEDDED**  
2           **CELLS SUB-POPULATIONS FROM FLUORESCENT MICROSCOPIC IMAGES**

3  
4 Short running title: simple tool for the quantitative analysis of fluorescent images

5  
6 Mikhail I Bogachev<sup>1,2</sup>, Vladimir Yu Volkov<sup>1,3,4</sup>, Oleg A Markelov<sup>1</sup>, Elena Yu Trizna<sup>2</sup>, Diana R  
7 Baydamshina<sup>2</sup>, Vladislav Melnikov<sup>1</sup>, Regina R Murtazina<sup>2</sup>, Pavel V Zelenikhin<sup>2</sup>, Irshad S  
8 Sharafutdinov<sup>2</sup>, Airat R Kayumov<sup>2,\*</sup>

9  
10  
11 <sup>1</sup>Radio Systems Department & Biomedical Engineering Research Center, St. Petersburg  
12 Electrotechnical University, St. Petersburg, Russia

13  
14 <sup>2</sup>Institute of Fundamental Medicine and Biology, Kazan Federal University, Kazan, Russia

15  
16 <sup>3</sup> Department of Radio Systems and Signal Processing, Bonch-Bruевич State Telecommunication  
17 University, St. Petersburg, Russia

18  
19 <sup>4</sup> Department of Radio Engineering Systems, State University of Aerospace Instrumentation, St.  
20 Petersburg, Russia

21  
22  
23 \* Corresponding author

24 E-mail: [kairatr@yandex.ru](mailto:kairatr@yandex.ru)

25  
26 Keywords: Microscopic images analysis; differential fluorescent staining; bacteria; eukaryotes;  
27 software

## 30 **Abstract**

31 Fluorescent staining is a common tool for both quantitative and qualitative assessment of pro- and  
32 eukaryotic cells sub-population fractions by using microscopy and flow cytometry. However, direct cell  
33 counting by flow cytometry is often limited, for example when working with cells rigidly adhered  
34 either to each other or to external surfaces like bacterial biofilms or adherent cell lines and tissue  
35 samples. An alternative approach is provided by using fluorescent microscopy and confocal laser  
36 scanning microscopy (CLSM), which enables the evaluation of fractions of cells subpopulations in a  
37 given sample. For the quantitative assessment of cell fractions in microphotographs, we suggest a  
38 simple two-step algorithm that combines single cells selection and the statistical analysis. To facilitate  
39 the first step, we suggest a simple procedure that supports finding the balance between the detection  
40 threshold and the typical size of single cells based on objective cell size distribution analysis. Based on  
41 a series of experimental measurements performed on bacterial and eukaryotic cells under various  
42 conditions, we show explicitly that the suggested approach effectively accounts for the fractions of  
43 different cell sub-populations (like the live/dead staining in our samples) in all studied cases that are in  
44 good agreement with manual cell counting on microphotographs and flow cytometry data. This  
45 algorithm is implemented as a simple software tool that includes an intuitive and user-friendly  
46 graphical interface for the initial adjustment of algorithm parameters to the microphotographs analysis  
47 as well as for the sequential analysis of homogeneous series of similar microscopic images without  
48 further user intervention. The software tool entitled *BioFilmAnalyzer* is freely available online at  
49 <https://bitbucket.org/rogex/biofilmanalyzer/downloads/>.

50

## 51           **Introduction**

52           One of the key issues in both pro- and eukaryotic cell studies is the quantitative characterization  
53 of cellular subpopulations like the estimation of the fractions of either live or dead cells in a given  
54 population, differentiation of bacterial species in mixed biofilms or eukaryotic cell types in culture.  
55 There are two common experimental approaches to these issues, namely the flow cytometry and the  
56 fluorescent microscopy. In both methods the cells are stained with fluorescent dyes which specifically  
57 differentiate the cells of interest. Thus, Syto9/PI, DioC6/PI, AO/PI, CFDA/PI, Calcein AM/PI,  
58 Hoechst/PI and many other combinations of dual staining are widely used to differentiate viable and  
59 non-viable cells [1-3]. Normally, the first dye is biochemically modified by viable cells followed by the  
60 production of the green-fluorescent product. The second dye like the propidium iodide or ethidium  
61 bromide penetrates through the damaged membrane of dead cells forming complexes with nucleic  
62 acids and providing red fluorescence. Despite of multiple reports that the estimation of viable cells  
63 fraction by using vital staining often exhibits significant differences in comparison with the values  
64 obtained by using classical microbiological methods [4], fluorescent staining remains a fast and easy  
65 approach to the quantification of (non-)viable cells.

66           While flow cytometry typically provides with a more accurate assessment of the cell  
67 subpopulation fractions [5, 6], it has several principal limitations that significantly narrow its  
68 application area [7]. In particular, cells being adhered to each other and to external surfaces should be  
69 suspended prior to their infusion into a cytometer that appears difficult when, for example, bacterial  
70 biofilms or strongly adherent cells are analyzed, or the original structure of the cell colonies, cell  
71 complex or tissue structure should be preserved. Moreover, flow cytometer is normally unable to detect  
72 particles  $<0.500 \mu\text{m}$  [8]. Finally, currently available flow cytometry systems require considerable  
73 amount of maintenance and highly skilled operators.

74           Fluorescent microscopy is largely free of above limitations and provides a reasonable  
75 alternative to the cytometric measurements. However, in the presence of adherent and/or spore-like  
76 cells they largely overlap leading to the limitations of direct cell selection and counting algorithms in  
77 the microscopic images. The situation gets even more complicated when the cells are not equidistantly  
78 stained, image quality and color balance varies in different fields of view. Despite of the above  
79 limitations, manual counting is usually still possible, while it requires significant efforts from experts  
80 increasing the lab personnel workload drastically. Thus, automatic or semi-automatic analysis of cells  
81 seems to be a fast and easy approach to the microscopic data quantification. In the last two decades, a  
82 number of methods and computer-assisted algorithms have been developed to resolve the cell counting

83 issue implemented in a number of both commercial and free software tools [9-13]. Existing software  
84 solutions include cell counting and classification algorithms [14], estimation of their parameters from  
85 microscopic imaging [15], 3d reconstructions from confocal microscopy data [16] and several other  
86 more specific applications. However, automatic microscopic image analysis remains challenging in the  
87 presence of adherent and/or spore-like cells that are common conditions in biofilm studies. Automatic  
88 counting methods are usually based either (i) on detection, selection and counting of discrete objects, or  
89 (ii) on the statistical analysis of the image properties that avoid direct counting approach and estimate  
90 some effective characteristics from the statistical properties of the entire image [17]. While the  
91 detection methods fail under cell overlapping conditions, the statistical assessment methods are unable  
92 to differentiate between various types of cells. Among few exceptions that largely overcome the above  
93 limitations, a very recently designed software tool for the quantification of live/dead cells in a biofilm  
94 based on a series of image transformation could be mentioned [18].

95 Another common disadvantage of many automatic image analysis tools in practical settings is  
96 often, though may sound surprising, their excessive use of automation. Quite often image analysis  
97 algorithms use complex transformations and filtering procedures with parameters that can be hardly  
98 controlled by the user who is often not an expert in digital image processing. As a result, there is little  
99 or no feedback between the algorithm and its end user. Thus, the user deals with a kind of black box  
100 design, where an image is inserted and a value comes out, without being able to cross-check the  
101 performance of the algorithm at some intermediate steps. Despite the increasing complexity and  
102 performance of image processing tools, the variety of cell structures and microscopic imaging  
103 conditions to our opinion is still too broad to fully rely upon automation in all cases.

104 Here we suggest an algorithm based on a simple combination of the object counting and  
105 statistical approaches implemented in an easy-to-use cell-counting software tool, *BioFilmAnalyzer*,  
106 freely available at <https://bitbucket.org/rogex/biofilmanalyzer/downloads/>. Following preliminary  
107 threshold-based filtering and segmentation of the image, an effective number of cells is calculated  
108 under partially-manual control by the investigator. To support the investigator with finding the right  
109 balance between the parameters that should be adjusted at the initial segmentation step, namely the  
110 selection threshold and the typical size range of single cells, we suggest a simple procedure that  
111 includes estimation of the histograms of the sizes of isolated objects after threshold-based filtering and  
112 an objective criterion based on the analysis of these histograms. Based on a series of experimental  
113 measurements performed in bacterial cells of *S. aureus* and *B. subtilis* exhibiting different shapes as  
114 well as eukaryotic cells, we show explicitly that the suggested approach effectively accounts for the

115 fractions of live/dead cells in all studied cases. The validity of the *BioFilmAnalyzer* based cells  
116 live/dead fractions quantification was assessed by comparison with the results of manual counting  
117 performed by several experts in visual microscopic image analysis and cytometric measurements.

118

119

## 120 **Materials and methods**

### 121 **Bacterial strains, cell lines and fluorescent microscopy**

122 The fluorescent microscopic images of bacterial cells obtained in previous works were used  
123 [19-23]. Briefly, *Staphylococcus aureus* (ATCC® 29213™) and *Bacillus subtilis* 168 grown in 35-mm  
124 TC-treated polystyrol plates (Eppendorf) for 48 hours under static conditions at 37°C to obtain rigid  
125 biofilm structures were further subjected to differential live/dead fluorescent staining.

126 The human colon adenocarcinoma Caco-2 cells (RCCC) were cultured in DMEM supplemented  
127 with 10% FBS, 2 mM L-glutamine, 100 µg ml<sup>-1</sup> penicillin and 100 µg ml<sup>-1</sup> streptomycin. The cells  
128 were seeded in 24-well plates at the density of 30000 cells per well and allowed to attach overnight.  
129 The cells were cultured at 37 °C and 5% CO<sub>2</sub> until 70% confluence and camptothecin (Sigma-Aldrich)  
130 was added in final concentration of 6 µM. After 24 h of exposition the cells were subjected to  
131 fluorescent staining and analyzed with flow cytometry and fluorescent microscopy.

132 The viability of biofilm-embedded cells was evaluated by staining for 5 min with the Acridine  
133 orange (Sigma) at final concentration of 0.12 µg/ml (green fluorescence) or 3,3'-  
134 Dihexyloxacarboyanine iodide (DioC6) (Sigma) at final concentration of 0.02 µg/ml (green  
135 fluorescence) and propidium iodide (Sigma) at final concentration of 3 µg/ml (red fluorescence) to  
136 differentiate between bacteria with intact and damaged cell membranes (live and dead cells). The  
137 eukaryotic cells were stained with DioC6 (0.02 µg/ml) and propidium iodide (3 µg/ml). The  
138 microscopic imaging was performed using either Carl Zeiss Observer 1.0 microscope or Carl Zeiss  
139 CLSM780 with 40-100× magnification.

### 140 **Flow cytometry**

141 Cytometric analysis was performed using BD FACSCanto II flow cytometer. The Caco-2 cells  
142 were stained as described above. Following data analysis was carried out using FACSDiva software.

### 143 **Image analysis methodology**

144 Image analysis starts with the preliminary detection of pixels with given color channel intensity  
145 (red, green, blue, or overall) exceeding a given threshold. Fig 1A shows a sample of original  
146 microscopic image, while Fig 1B shows the result of threshold-based selection of the red channel  
147 according to the differential rule  $I_R - I_G > T$ , where  $I_R$  and  $I_G$  are the intensities in the red and in the  
148 green channels, respectively,  $T = 30$  is the threshold setting. In the next step, the preprocessed image is  
149 segmented into separate non-overlapping objects by adjusting horizontally, vertically or diagonally  
150 neighboring pixels above the threshold to the same object. Additionally, objects with a given set of

151 properties that determine the cell subpopulation are selected. Fig 1C exemplifies the results of selection  
 152 by size, with objects only in a given size range between  $s_{\min} = 500$  and  $s_{\max} = 1000$  pixels being  
 153 highlighted, where the color encodes each object.

154 In the following, we count the selected objects, calculate their total area, and obtain the average  
 155 size of the typical cell from the studied subpopulation. Next we determine the effective number of cells  
 156 by dividing the total area above the threshold (Fig 1B) by the average size of the selected cells (Fig 1C)  
 157 according to

$$158 \quad N_R^{\text{eff}} = \frac{S_R}{\bar{S}_R [s_{\min} \dots s_{\max}]} \quad \text{and} \quad N_G^{\text{eff}} = \frac{S_G}{\bar{S}_G [s_{\min} \dots s_{\max}]},$$

159 where  $N_R^{\text{eff}}$ ,  $N_G^{\text{eff}}$  are the effective numbers of cells in the red and the green channels, respectively;  
 160  $S_R$ ,  $S_G$  are the total area of selected cells belonging to the red and the green channels, respectively;  
 161  $\bar{S}_R [s_{\min} \dots s_{\max}]$ ,  $\bar{S}_G [s_{\min} \dots s_{\max}]$  are the average area of cells with a size range between  $s_{\min}$  and  $s_{\max}$ .

162

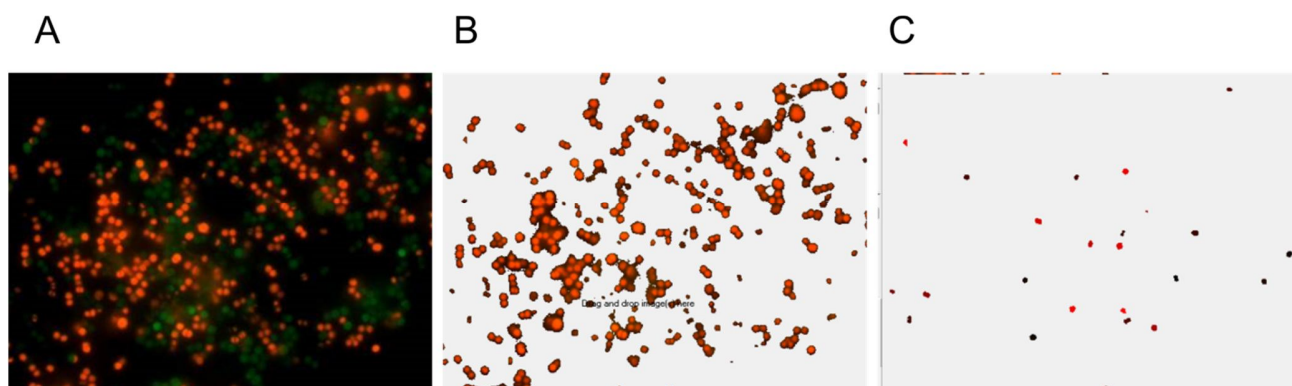

163

164 **Fig 1. Consecutive steps in cell quantification by *BioFilmAnalyzer*.** (A) original image containing  
 165 overlapped red and green channels, (B) selected red channel data after threshold-based filtering, (C)  
 166 selected cells of size between  $s_{\min}$  and  $s_{\max}$  that are used to determine the effective single cell size with  
 167 each separate cell shown by another color as determined by the automatic segmentation algorithm.

168

169 While  $T$ ,  $s_{\min}$  and  $s_{\max}$  have to be appropriately chosen, their choice has to be performed once  
 170 in a series of similar experiments considering similar cell types as well as similar staining and imaging  
 171 conditions. Accordingly, so far their manual choice by expert seems to be the easiest solution option,  
 172 since the feedback from the samples tested first allows for a more specific adjustment of these  
 173 parameters, to avoid potentially bizarre results that may arise in the case of blind choice of algorithm  
 174 parameters with no feedback. In the following, for the entire image series the parameters are fixed and

175 no further manual adjustment is required. Thus a series of images representing different fields of view  
 176 under identical conditions in simply passed through an algorithm. When the differences in the  
 177 conditions are minor and do not change significantly the microscopic images, but influence only some  
 178 of their parameters like the live/dead cell fractions, such as testing antimicrobials with gradually  
 179 changing concentrations, several series of images can be submitted without further adjustment of the  
 180 algorithm parameters. The implemented software solution organizes the results of calculations in a  
 181 table that could be exported and represents them graphically.

182

### 183 **Statistical assessment**

184 Here we used simple linear regression without the intercept term, i.e.  $y = kx$ . In the suggested  
 185 regression model the ideal case corresponds to  $k = 1$  or simply  $y = x$  that would mean perfect  
 186 agreement between automatic and manual expert counting. The quality of the results is characterized by  
 187 two independent coefficients. The first one is the standard coefficient of determination  $R^2 = 1 - \frac{SS_{res}}{SS_{tot}}$ ,

188 where  $SS_{tot}$  is the total sum of squares  $SS_{tot} = \sum_i (f_i - \bar{y})^2$  and  $SS_{res}$  is the residual sum of squares

189  $SS_{res} = \sum_i (y_i - f_i)^2$ , here  $\bar{y} = \frac{1}{n} \sum_{i=1}^n y_i$  is the mean value of all analyzed data points and  $f_i$  is calculated

190 regression point. The  $R^2$  coefficient indicates how well the analyzed data set is replicated by the  
 191 regression model.

192 In our study it was also important how close is the regression model to the ideal case  $y = x$ .  
 193 Therefore we introduced a similarly designed metric of how well the model  $y = kx$  is close to the ideal  
 194 counting line  $y = x$  which we denote here by  $L^2$ . Its definition is similar to  $R^2$  besides the calculation is  
 195 performed for the regression points  $f_i$ .  $SS_{res}$  for  $L^2$  is calculated as  $SS_{res} = \sum_i (f_i - x_i)^2$ , where  $x_i$  is  
 196 the corresponding abscissa value for the current  $f_i$ , and  $SS_{tot}$  is the same as in  $R^2$ . In ideal case when

197 observational regression line follows  $y=x$ ,  $L^2 = 1 - \frac{\sum_i (f_i - x_i)^2}{\sum_i (f_i - \bar{f})^2} = 1 - \frac{0}{\sum_i (f_i - \bar{f})^2} = 1$ . Thus both  $R^2$  and

198  $L^2$  coefficients range from 0 to 1.

199



## 200           **Results and Discussion**

### 201           **Software description**

202           *BioFilmAnalyzer* software (S1 and S2 Files) can be used to count any bacterial or eukaryotic  
203 fluorescent stained cells from two-dimensional microphotographs provided either as single images or  
204 as series of images obtained under similar conditions such as staining, magnification and color balance  
205 (for example, several views of the same sample taken with fixed camera settings). This in-house  
206 algorithm was implemented in C++ programming language and is compatible with Windows (2000/XP  
207 versions and higher). The software tool has a simple user-friendly environment for the image analysis  
208 with the two-step algorithm allowing manual parameter adjustments by end user at the initial step and  
209 automatic image series analysis at the second step. The logic of the image analysis is based on the  
210 preliminary adjustment of the algorithm parameters by using one or several images that the investigator  
211 finds more or less representative for the studied cohort in terms of imaging conditions. In the first step,  
212 simple drag & drop of a single image into the program window initiates its instant processing including  
213 threshold based detection of cells according to a specified rule based on the exceedance of a given  
214 threshold by either a certain color channel, difference between color channels or overall intensity. The  
215 threshold value  $T$  which is the only algorithm parameter in this first step can next be adjusted by the  
216 investigator by its increasing in cases of strongly autofluorescent background or by its decreasing in  
217 low contrast images until the background noise is eliminated. The view can be easily switched between  
218 the original and the processed images by a single click on the upper image panel.

219           For image series exhibiting strongly non-homogeneous color distributions in the studied color  
220 channels, there are two common solutions, including (I) adaptive adjustment of the threshold value  $T$   
221 for each of the images individually, as well as (II) preliminary image color normalization that often  
222 appears a faster alternative. Since color normalization is a simple and standard image preparation  
223 procedure that is straightforward and thus can be applied consecutively to a series of images using  
224 many commercial or free image processing software tools (e.g., ImageMagick, Gimp etc.), we do not  
225 focus further on this issue. However, often significant image preprocessing leads to other problems,  
226 such as the increased level of the background noise that is enhanced together with the useful parts of  
227 the image when amplifying the intensity of the color channel with low intensity in the original image.  
228 For that reason, adaptive thresholding often appears a more efficient solution. As we show below, our  
229 algorithm is robust against moderate variations of the threshold  $T$  around its optimized value for a  
230 given color distribution, and thus the color normalization appears unnecessary for image series with

231 moderate variations of color distributions. For those images exhibiting considerable variations of  
232 staining and imaging conditions, or pronounced color imbalance, the more preferable adaptive  
233 thresholding procedure is still possible.

234 In the second step, the effective cell size should be adjusted such that only or nearly only single  
235 cells appear in the lower image panel, which shows the processed image after a simple segmentation  
236 procedure. Increasing the lower limit of the cell size helps to eliminate some noise bursts, while  
237 decreasing the upper limit eliminates large patches of adherent cells from the effective cell size  
238 statistics. With the cell size window representing only a simple criteria that often appears insufficient,  
239 whenever necessary, further elimination of anomalous segments can be done manually by selecting and  
240 double-clicking over them in the lower image panel. Since the parameters including sizes of different  
241 sub-population of cells can differ from one another (e.g., non-viable eukaryotic cells are commonly  
242 smaller than viable cells), the effective cell size should be re-adjusted for each studied sub-population  
243 of cells. For this reason, the analysis of each color channel should be performed separately, and thus  
244 with the exception of the intensity based analysis rule, all other options analyze color channels  
245 individually. Thus they perform similarly for single or overlapped color channel images.

246 In general, the threshold  $T$  and single cell size range are interdependent. Since single cells are  
247 represented by inhomogeneous color intensity, with increasing the threshold  $T$  typical sizes of isolated  
248 objects representing single cells decrease, due to the removal of some pixels with intensity smaller than  
249  $T$ . For that reason, it is important to keep the right balance between the chosen threshold  $T$  and the  
250 single cells size range between  $s_{\min}$  and  $s_{\max}$ . In the following, we suggest an objective criterion for  
251 keeping such balance based on the analysis of the histograms of isolated objects sizes that is  
252 implemented in the software tool and validated by multi-threshold analysis.

253 Finally, the effective number of cells is determined as the total area of the image exceeding the  
254 threshold  $T$  shown in the upper panel divided by the effective cell size determined from the lower  
255 image panel. Once a reasonable set of algorithm parameters is found, a series of up to 100 images can  
256 be dropped onto the program window for fully automated analysis with the same set of parameters as  
257 determined from the first one or several representative images without further user intervention.  
258 Finally, the results can be exported to MS Excel for validation of the results and following statistical  
259 analysis. In comparison with some other freely available image processing and analysis software [18,  
260 24, 25], our image analysis procedure is semi-automatic: the initial settings, while based on an  
261 objective statistical criterion, are modified by manual adjustment of the algorithm parameters and each  
262 step of the processing algorithm is fully visualized to enable expert controlled and assessment of the

263 analysis quality. Once optimized for a representative sample image, the software tool next analyzes the  
264 entire image series automatically over coffee-break.

## 265 **Software validation by bacterial cells counting**

266 We analyzed the efficiency of the proposed algorithm using the fluorescent images of coccal  
267 (*Staphylococcus aureus*) and rod (*Bacillus subtilis*) cell morphologies containing different fraction of  
268 viable (green-stained) cells. Since the cell suspension can be easily analyzed with flow cytometry, we  
269 focused on the analysis of adherent, biofilm-embedded cells. For that, we used previously obtained  
270 series of microphotographs of *S. aureus* in 48-72 h old biofilms treated with different antimicrobials  
271 [19, 21]. Cells were stained with DioC6 and propidium iodide to differentiate the viable and non-viable  
272 cells, and non-viable cells fraction was quantified with *BioFilmAnalyzer* software. As a representative  
273 example, twelve images with overlapped red and green channels containing different fraction of viable  
274 cells are shown in Fig 2. Since the image brightness, contrast and saturation vary from image to image  
275 depending on the staining quality, microscope settings and sample itself, for each microphotograph  
276 shown in Fig 2 the thresholds  $T$  (ranging from 25 to 55) and effective cell sizes were chosen  
277 individually. Next to validate the performance of the algorithm when the intensity threshold is chosen  
278 quite arbitrarily without careful manual adjustment to the imaging conditions, these microphotographs  
279 were analyzed consequently for different analysis thresholds (15, 20, 30, 45 and 60) and the results  
280 obtained by the automatic cell counting were plotted as a linear function  $y = kx$  of the manual cell  
281 counting (Figs 3A-3C). While the number of both red (non-viable, Fig 3A) and green (viable, Fig 3B)  
282 cells decreases at higher thresholds, their fractions (i.e., live/dead ratio) remained rather the same for  
283 each threshold value exhibiting no significant differences with the manual evaluation data (compare  
284 thick dashed line corresponding to the ideal fit of manual and automatic counting, Fig 3C).

285 Table 1 shows the regression coefficients  $k$  for the linear regressions  $y = kx$  and their  
286 coefficients of determination  $R^2$ . Since by definition there should be no systematic shift between the  
287 automatic and the manual count, i.e. in the absence of viable or non-viable cells the respective number  
288 of cells equals zero, we used the simplest linear regression model without intercept. Since the ideal  
289 counting corresponds to  $k = 1$  or simply to the  $y = x$  line, we also calculated another coefficient  
290 denoted  $L^2$  that determines the deviation of the obtained regression line  $y = kx$  from the ideal counting  
291 line  $y = x$ . Of note, the automatic cell enumeration by *BioFilmAnalyzer* software exhibited the best fit  
292 with manual count at the analysis threshold of 45 (for images presented in Fig 2). For further details on  
293 the statistical analysis of our results, we refer to the Materials and Methods section.

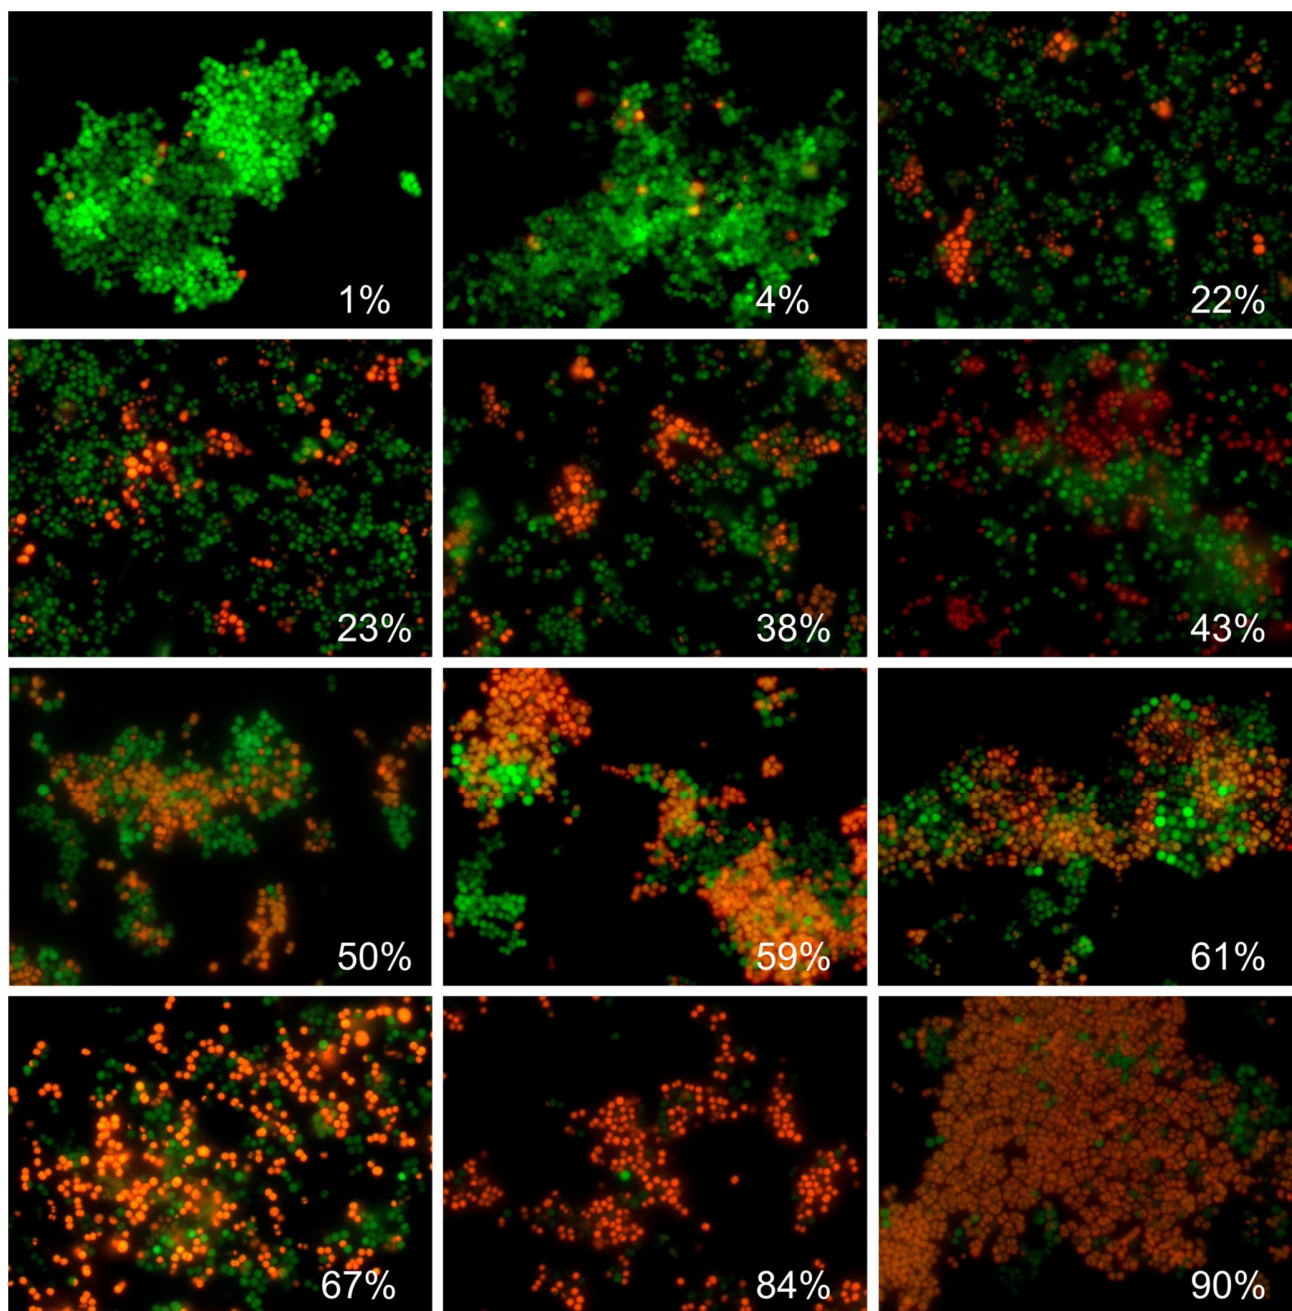

294

295 **Fig 2. Evaluation of the *S. aureus* biofilm-embedded non-viable cells fraction by using**  
296 ***BioFilmAnalyzer* software exemplified for 12 microscopic images. The percentage of red-stained**  
297 **cells quantified by the *BioFilmAnalyzer* software is shown in each panel.**

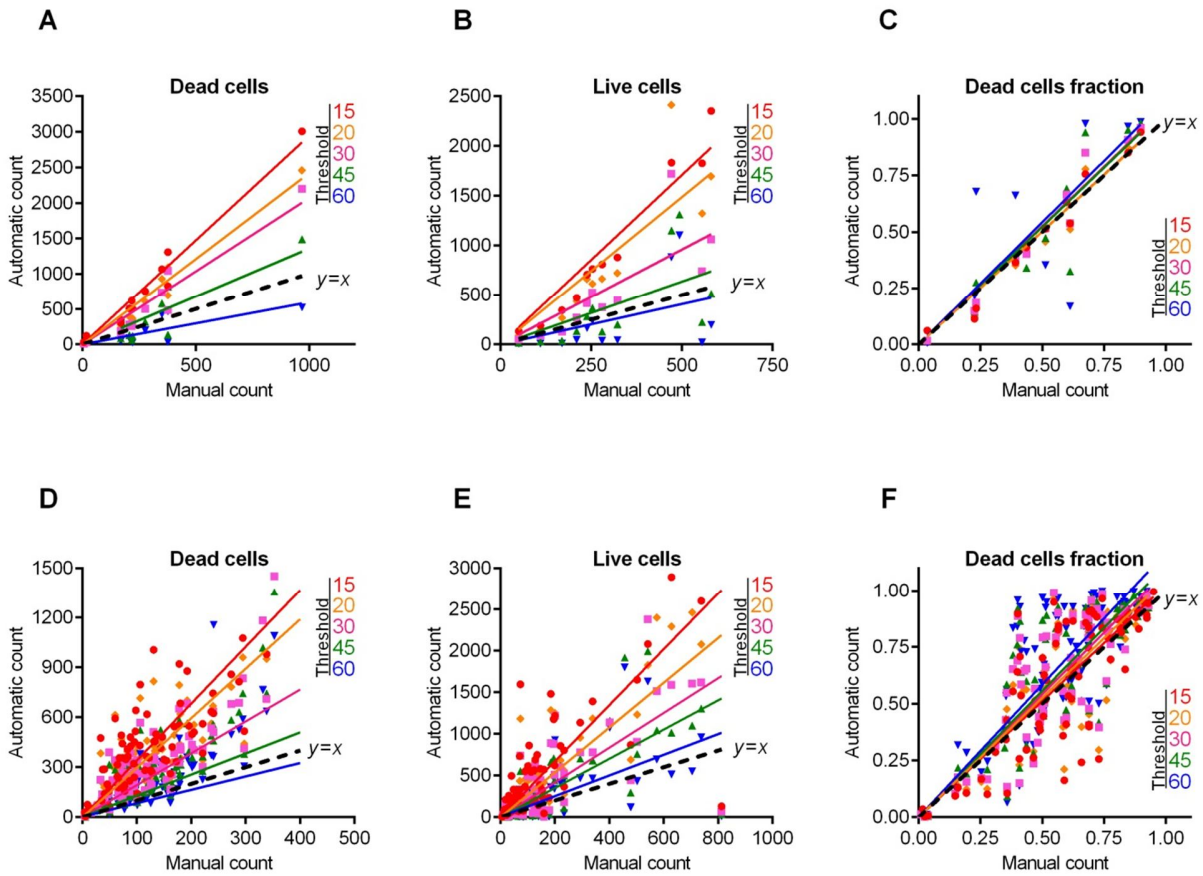

298

299 **Fig 3. *S. aureus* cells count and live/dead ratio dependence on the image analysis threshold  $T$ .** Full  
 300 lines show the linear regression lines, while dashed line shows the ideal counting line as determined by  
 301 the manual analysis performed by several experts in visual microscopic image analysis. Panels A-C  
 302 show data for the 12 images presented in Fig 2. Panels D-F show data for the 115 microscopic images  
 303 taken randomly from different experiments with various imaging conditions.

304

305 **Table 1. Regression coefficients  $k$ , the coefficients of determination  $R^2$  and the accuracy**  
 306 **coefficient  $L^2$  indicating the correspondence between the automatic and the manual counting for**  
 307 **the *S.aureus* live/dead ratios on fluorescent images.**

| Threshold | 12 images |       |       | 115 images |       |       |
|-----------|-----------|-------|-------|------------|-------|-------|
|           | k         | $R^2$ | $L^2$ | k          | $R^2$ | $L^2$ |
| 15        | 1,01      | 0,95  | 1,00  | 1,02       | 0,63  | 1,00  |
| 20        | 1,00      | 0,94  | 1,00  | 1,05       | 0,65  | 0,99  |
| 30        | 1,05      | 0,94  | 0,99  | 1,08       | 0,66  | 0,98  |
| 45        | 1,05      | 0,73  | 0,99  | 1,11       | 0,72  | 0,96  |
| 60        | 1,09      | 0,59  | 0,98  | 1,17       | 0,67  | 0,92  |

308

309 Individual adjustment of the threshold and effective cell size is obviously possible only when a  
310 small number of images should be analyzed. For a more accurate quantification, a series of 10 or more  
311 images from the same sample should be analyzed. The *BioFilmAnalyzer* software allows analysis with  
312 constant settings of threshold and cell size of two or more images when they are dragged & dropped  
313 simultaneously onto the program window. To estimate the performance of the software when the  
314 images with different quality are analyzed without individual optimization of the intensity threshold, a  
315 series of 115 microphotographs randomly taken from different experiments were analyzed  
316 consequently for different thresholds (15, 20, 30, 45 and 60) with fixed cell size ranges used to  
317 determine the effective cell sizes. The results were compared against manual cell counting data (Figs  
318 3D-3F). Similarly to previous results obtained for 12 images with accurate settings of both thresholds  
319 and cell sizes, the live/dead ratio remained almost the same for each threshold value and the obtained  
320 regression fit was in an excellent agreement with the manual cell counting data indicated by  $L^2$  being  
321 very close to 1.0 at thresholds in the range of 15-30 (Table 1).

322 Next, similar analysis was performed for the microscopic images of *B. subtilis* biofilm-  
323 embedded cells treated with different antimicrobials [20]. Like in the previous example, Fig 4 shows 12  
324 representative images with different fraction of viable cells quantified with *BioFilmAnalyzer* software.  
325 Figs 5A–5C are designed similarly as Fig 3 and show the interdependence of the image analysis  
326 threshold and cell count calculated by *BioFilmAnalyzer*. Similar to *S. aureus* microphotographs, the  
327 cell count calculated automatically increased at high threshold with the best fit with manual count at  
328 threshold value of 45, while the live/dead ratio remained unchanged with  $L^2$  exceeding 0.96 at  
329 thresholds up to 45, suggesting that the performance of the algorithm does not depend on the fine  
330 tuning of the threshold and on the cell shape. Figs 5D-5F show the analysis of 50 randomly chosen  
331 images of live/dead stained *B. subtilis* cells. Similarly, statistical analysis did not reveal significant  
332 differences between automatic and manual live/dead ratio estimation (Table 2).

333 While the absolute cell count depends on the image analysis threshold which should be adjusted  
334 manually and therefore has a factor of subjectivity, the live/dead ratio quantification does not depend  
335 on the threshold settings in the range of 15-60 color intensity units (on the 0..255 scale) exhibiting  
336 linear function with  $R^2$  values exceeding 0.9 and regression coefficients of  $k$  ranging between 0.9 and  
337 1.1 (Tables 1 and 2). This fact allows performing automatic analysis of multiple images with constant  
338 settings optimized from the first image in a series.

339

340

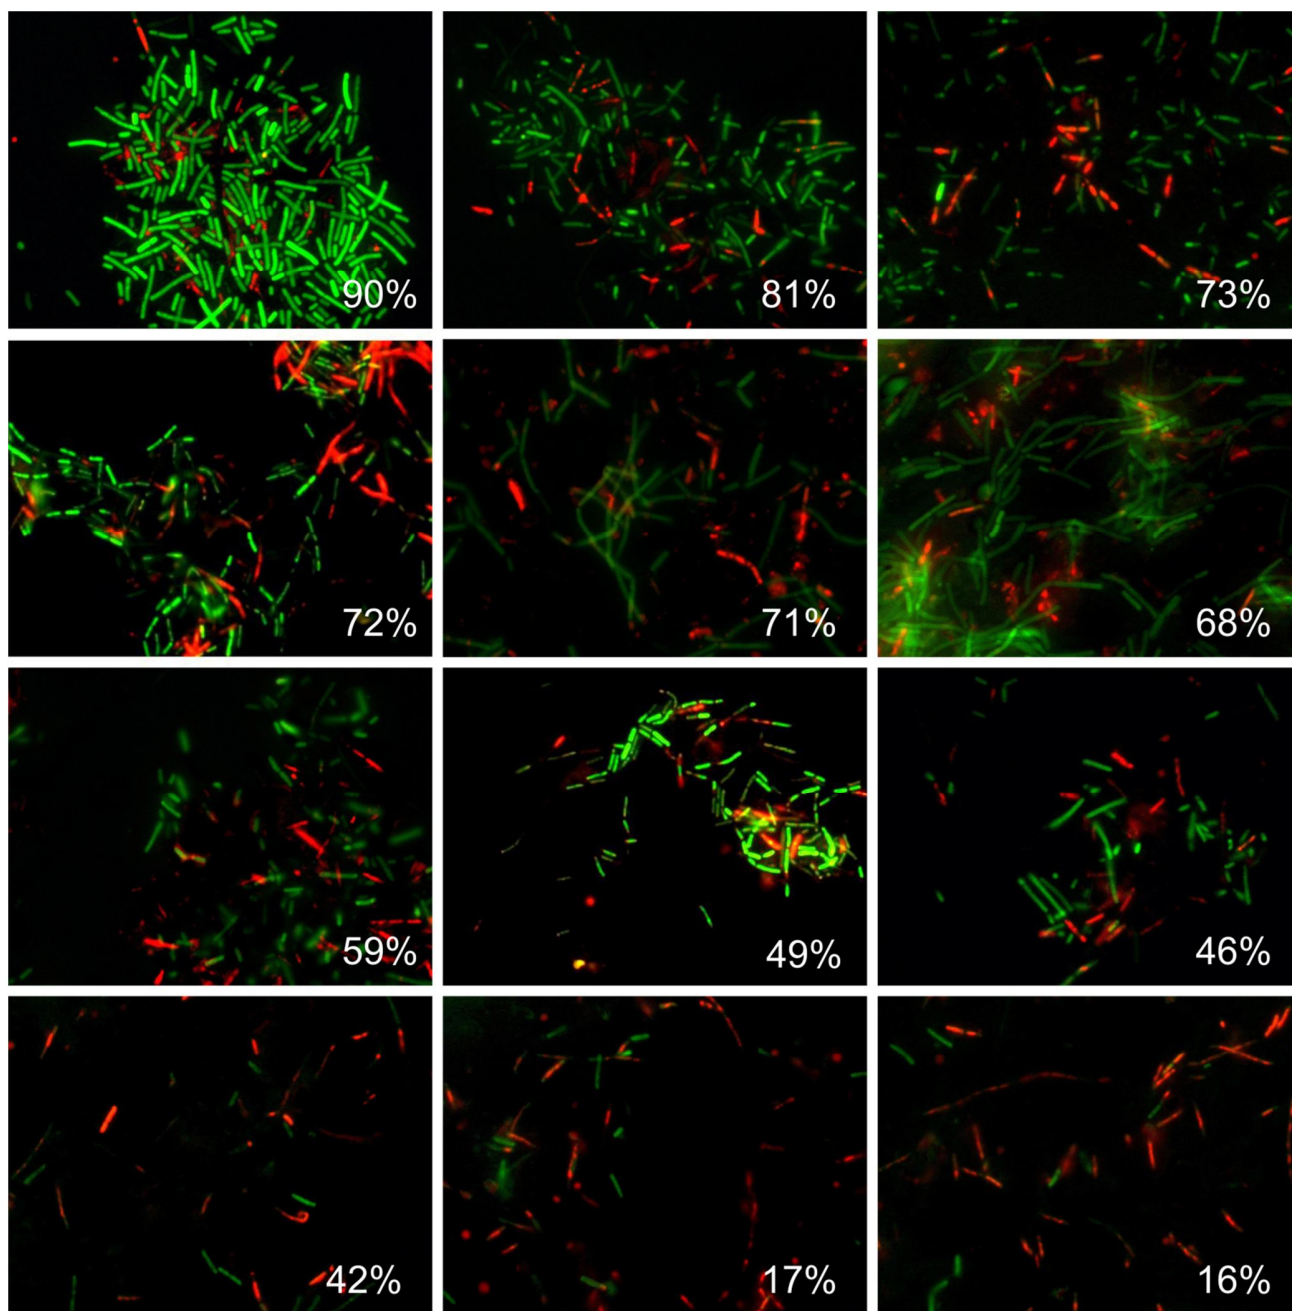

341  
342  
343  
344  
345

**Fig 4. Evaluation of the *B. subtilis* biofilm-embedded non-viable cells fraction by using *BioFilmAnalyzer* software exemplified for 12 microscopic images. The percentage of red-stained cells quantified by the *BioFilmAnalyzer* software is shown in each panel.**

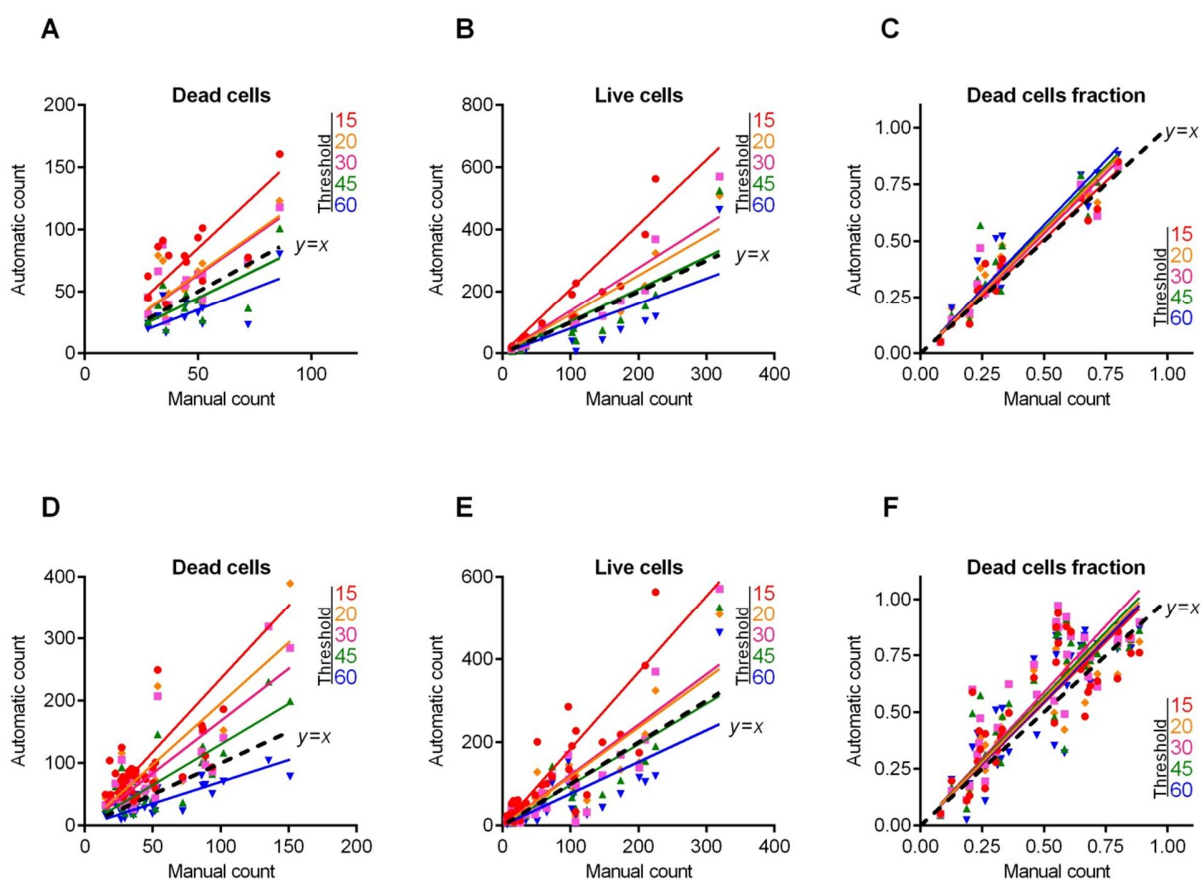

346

347

**Fig 5. *B. subtilis* cells count and live/dead ratio dependence on the image analysis threshold  $T$ .**

348

Full lines show the linear regression lines, while dashed line shows the ideal counting line as

349

determined by the manual analysis performed by several experts in visual microscopic image analysis.

350

Panels A-C show data for the 12 images presented in Fig 4. Panels D-F show data for the 50

351

microscopic images taken randomly from different experiments with various imaging conditions.

352

353

**Table 2. Regression coefficients  $k$ , the coefficients of determination  $R^2$  and the accuracy**

354

**coefficient  $L^2$  indicating the correspondence between the automatic and the manual counting for**

355

**the *B.subtilis* live/dead ratios on fluorescent images**

| Threshold | 12 images |       |       | 50 images |       |       |
|-----------|-----------|-------|-------|-----------|-------|-------|
|           | $k$       | $R^2$ | $L^2$ | $k$       | $R^2$ | $L^2$ |
| 15        | 1,02      | 0,92  | 1,00  | 1,08      | 0,72  | 0,97  |
| 20        | 1,09      | 0,93  | 0,97  | 1,11      | 0,74  | 0,95  |
| 30        | 1,07      | 0,91  | 0,98  | 1,17      | 0,75  | 0,90  |
| 45        | 1,10      | 0,84  | 0,96  | 1,14      | 0,74  | 0,93  |
| 60        | 1,14      | 0,90  | 0,93  | 1,10      | 0,74  | 0,96  |

356

357



## 358 **Eukaryotic cells counting**

359 The performance of *BioFilmAnalyzer* software was also analyzed for the eukaryotic cells. For  
360 that, Caco-2 cells were treated with different concentrations of camptothecin and analyzed after 24h of  
361 exposition. Figs 6 and 7C show the fractions of viable cells quantified with *BioFilmAnalyzer* software  
362 on microphotographs with overlapped green and red channels. Here, the best fit of manual and  
363 automatic count of either live or dead cells was observed for the analysis threshold  $T=30$  (Fig 7). In  
364 contrast to bacterial cells, the accuracy was lower ( $L^2$  over 0.80), probably, because of the discrepancies  
365 in the cell sizes and uneven staining of cells. In contrast, when the software performance was evaluated  
366 on a series of 87 randomly chosen images (Figs 7D–7F), the automatic estimation of live/dead fractions  
367 fits with manual one with high confidence level ( $L^2$  equals 1.0, see Table 3). This effect could be  
368 attributed to larger effective sizes and thus also smaller average number of cells in each field of view  
369 for eukaryotic cells compared to bacterial cells that in turn requires analyzing more images in order to  
370 obtain similar statistics.

371 To verify the accuracy of the overall procedure including both microscopic imaging and  
372 automatic cells counting, treated cells were detached from the wells by trypsin treatment, stained with  
373 DioC6 and ethidium bromide and aliquoted. One half of the sample was analyzed with flow cytometry  
374 to evaluate the fraction of necrotic cells, while the other half was subjected to microscopy and  
375 quantified by *BioFilmAnalyzer*. Fig 8 shows fractions of non-viable cells in 4 independent repeats  
376 quantified with flow cytometry versus automatic analysis of series of 10 microphotographs from each  
377 sample with separate green and red channels (representative examples of images are shown in the  
378 figure).

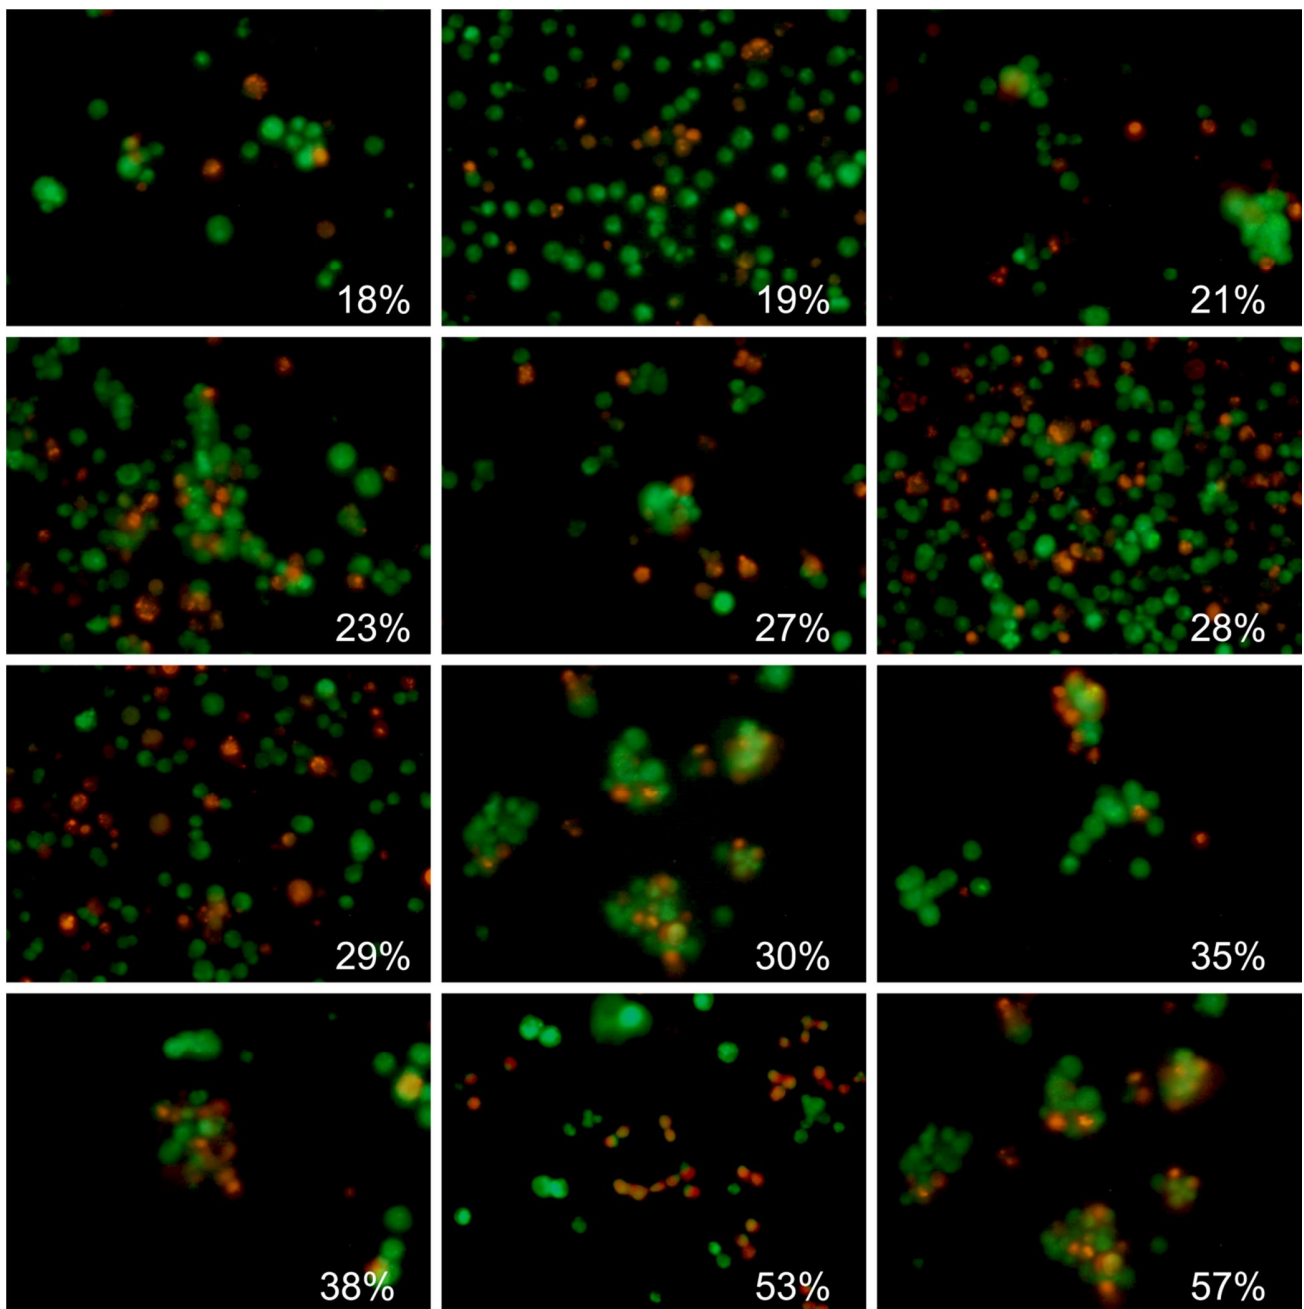

379

380 **Fig 6. Evaluation of the Caco-2 non-viable cells fraction by using *BioFilmAnalyzer* software**  
381 **exemplified for 12 microscopic images. The percentage of red-stained cells quantified by the**  
382 ***BioFilmAnalyzer* software is shown in each panel**

383

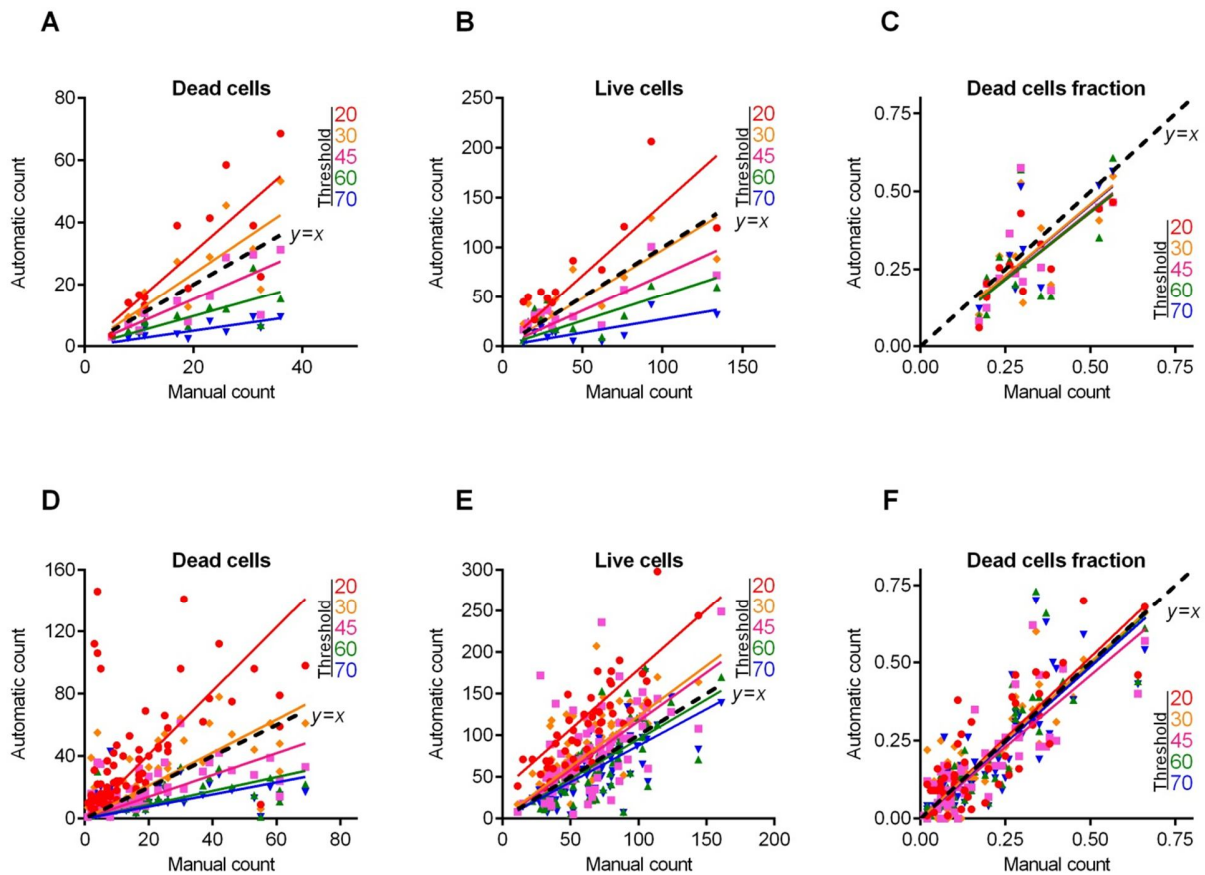

384

385

386

387

388

389

390

391

392

393

**Fig 7. Caco-2 cells count and live/dead ratio dependence on the image analysis threshold  $T$ .** Full lines show the linear regression lines, while dashed line shows the ideal counting line as determined by the manual analysis performed by several experts in visual microscopic image analysis. Panels A-C show data for the 12 images presented in Fig 6. Panels D-F show data for the 87 microscopic images taken randomly from different experiments with various imaging conditions

**Table 3. Regression coefficients  $k$ , the coefficients of determination  $R^2$  and the accuracy coefficient  $L^2$  indicating the correspondence between the automatic and the manual counting for the Caco-2 live/dead ratios on fluorescent images**

| Threshold | 12 images |       |       | 87 images |       |       |
|-----------|-----------|-------|-------|-----------|-------|-------|
|           | $k$       | $R^2$ | $L^2$ | $k$       | $R^2$ | $L^2$ |
| 15        | nd        | nd    | nd    | nd        | nd    | nd    |
| 20        | 0,86      | 0,69  | 0,80  | 1,03      | 0,73  | 1,00  |
| 30        | 0,92      | 0,53  | 0,93  | 1,00      | 0,76  | 1,00  |
| 45        | 0,88      | 0,46  | 0,83  | 0,92      | 0,71  | 0,97  |
| 60        | 0,87      | 0,40  | 0,81  | 0,99      | 0,73  | 1,00  |
| 70        | 0,91      | 0,54  | 0,92  | 0,97      | 0,71  | 1,00  |

394

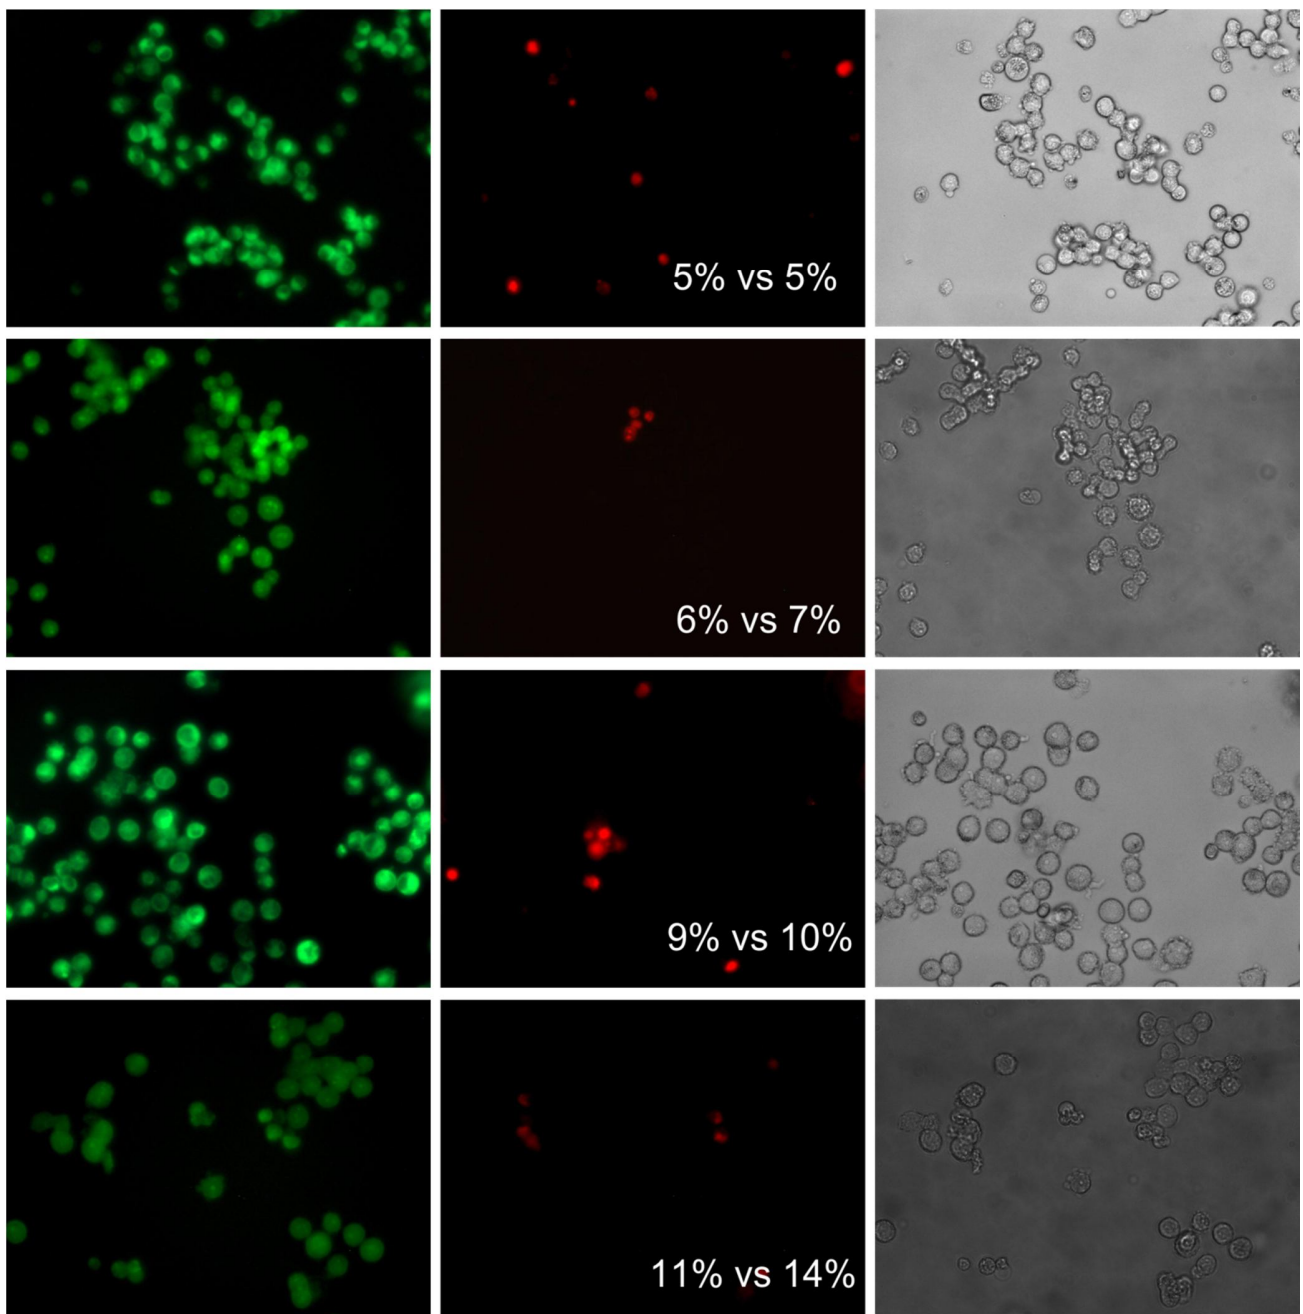

395

396

397

398

399

400

401

402

403

**Fig 8. The fraction of the non-viable eukaryotic cells quantified by flow cytometry versus automatic analysis with *BioFilmAnalyzer*.**

### **Quantification of confocal images with Z-stacks**

Finally, we used the same algorithm and software to analyze confocal images with Z-stacks, including 4 confocal images of *S. aureus* cells treated with different antimicrobials from our recent work [22, 23]. For that, we analyzed the raw series of 2D images that were used previously to reconstruct 3D images in [22, 23], where the fraction of live/dead cells were evaluated by both

404 automatic and manual expert counting (Fig 9).

405 Typically 2d images obtained by confocal layer scanning technique are lower quality in  
406 comparison with single layer fluorescent microscopic images considered above. There are generally  
407 several contributing effects including defocus aberration of the cells that appear close but nevertheless  
408 displaced against the focal point due to the limited depth of focus as well as motion blur due to the  
409 sample shift during operation. Both effects lead to blurred images, the problem that is partially resolved  
410 in the 3d reconstruction algorithms by averaging or smoothing filters that improve the overall image  
411 quality at the cost of its effective resolution. The question is, whether raw 2d images obtained by  
412 confocal layer scanning technique can be used for the cell sub-population quantification using our  
413 algorithm, and whether this would require some preliminary filtering to reduce blurring effects. For the  
414 latter, two standard image filtering techniques, namely the Gaussian and the Sobel filters have been  
415 tested. The Sobel filtering aims on edge detection in the images using a discrete differentiation operator  
416 which computes an approximation of the gradient of the image intensity function. Therefore this kind  
417 of image preparation might be helpful to make edges of cells more stepwise and thus to reduce the  
418 dependence of the performance of the cell counting algorithm on the choice of the threshold that may  
419 then appear anywhere within this step. Alternatively, blurring may be treated as effective additive noise  
420 that could be reduced with simple Gaussian filter. Exhibiting a Gaussian impulse response, such filter  
421 decreases the overall noise level in the image.

422 Fig 10 shows an example of 2d confocal Z-stack microscopic image before and after Gaussian  
423 and Sobel filtering (upper panel) and the regression functions of automatic cells count at different  
424 thresholds as a function of the manual cell count (lower panel) before and after preliminary filtering of  
425 the images (obtained for the entire cohort of studied confocal images). The figure shows that, while the  
426 image appears visually less blurred, there is no significant improvement on cells fraction count  
427 according to the regression analysis results (see also Table 4). Furthermore, preliminary filtering leads  
428 to the overestimation of the red-stained cell count in some samples analyzed, this way also corrupting  
429 the overall sub-population fraction estimates. Therefore, we find that due to the general robustness of  
430 the sub-population fraction estimation against moderate variations of the threshold  $T$  (and thus also its  
431 relation with the quantile of the image color distribution), 2d images obtained by confocal layer  
432 scanning technique can be analyzed without preliminary image filtering.

433

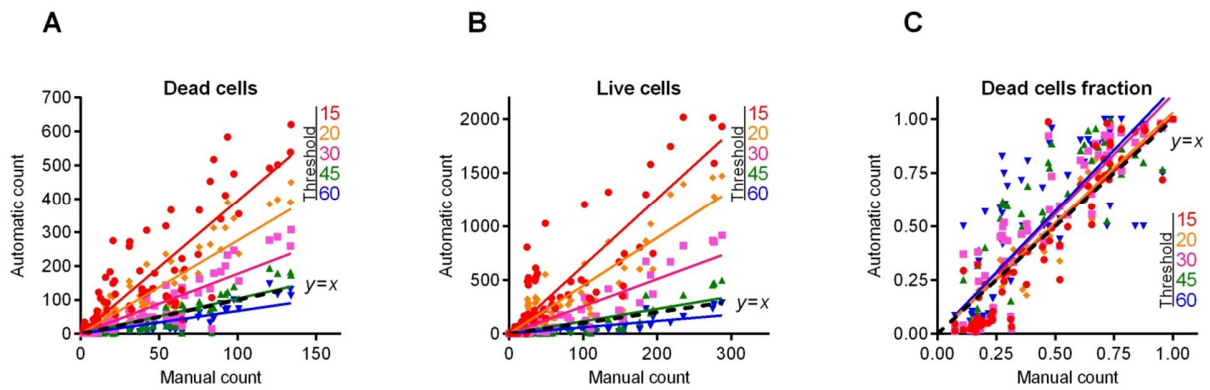

434  
 435 **Fig 9. Automatic vs manual cell count cell count and live/dead ratio dependence for different**  
 436 **image analysis thresholds  $T$ .** Full lines show the linear regression lines, while dashed line shows the  
 437 ideal counting line as determined by the manual analysis performed by several experts in visual  
 438 microscopic image analysis. Four different confocal images containing between 12 and 23 Z-stacks  
 439 each were taken for the analysis.

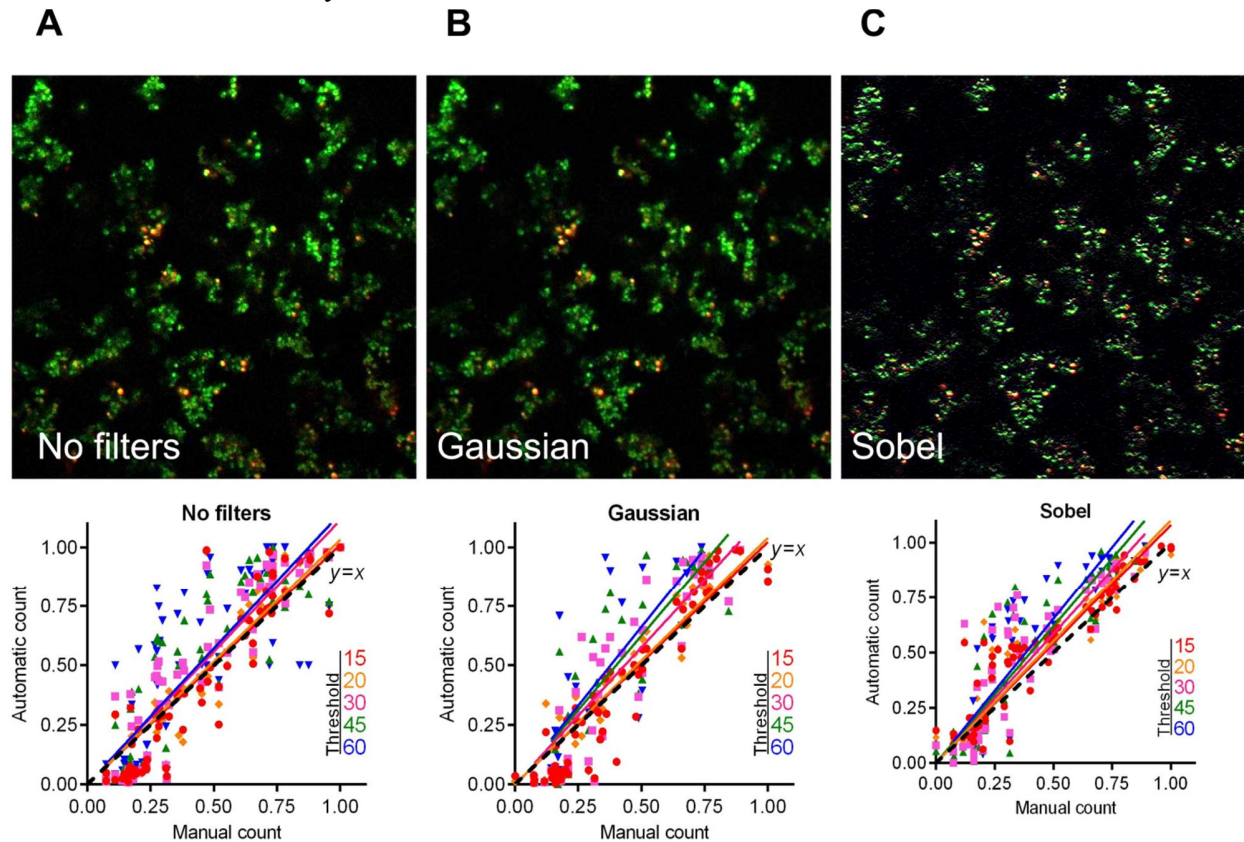

440  
 441 **Fig 10. The live/dead ratio dependencies for different image analysis thresholds  $T$ .** Full lines show  
 442 the linear regression lines, while dashed line shows the ideal counting line as determined by the manual  
 443 analysis performed by several experts in visual microscopic image analysis. Four confocal images  
 444 containing between 12 and 23 Z-stacks were taken for the analysis, before and after being subjected to  
 445 either Gaussian or Sobel filtering, as indicated.

446 **Table 4. Regression coefficients  $k$ , the coefficients of determination  $R^2$  and the accuracy**  
447 **coefficient  $L^2$  indicating the correspondence between the automatic and the manual counting for**  
448 **the *S.aureus* live/dead ratios on confocal images.**

| Threshold | No filters |       |       | Gaussian |       |       | Sobel |       |       |
|-----------|------------|-------|-------|----------|-------|-------|-------|-------|-------|
|           | k          | $R^2$ | $L^2$ | k        | $R^2$ | $L^2$ | k     | $R^2$ | $L^2$ |
| 15        | 1,01       | 0,81  | 1,00  | 1,02     | 0,85  | 1,00  | 1,08  | 0,87  | 0,98  |
| 20        | 1,03       | 0,81  | 1,00  | 1,04     | 0,83  | 0,99  | 1,10  | 0,84  | 0,97  |
| 30        | 1,11       | 0,82  | 0,95  | 1,15     | 0,76  | 0,92  | 1,17  | 0,77  | 0,92  |
| 45        | 1,14       | 0,77  | 0,93  | 1,25     | 0,71  | 0,78  | 1,24  | 0,79  | 0,87  |
| 60        | 1,14       | 0,68  | 0,93  | 1,32     | 0,60  | 0,69  | 1,30  | 0,78  | 0,78  |

449

450

## 451 **Adjustment of the threshold and single cell size balance**

452 As we have already mentioned above, typical single cell sizes vary for different thresholds  $T$ ,  
453 and thus the choice of these parameters should be properly balanced. Therefore, in general, for every  
454 chosen single cell size range there is an optimal threshold value  $T$ , and vice versa. Our results indicate  
455 that moderate threshold imbalance does not affect the overall statistics significantly, especially when  
456 averaging over large image series. However, in some cases adaptive threshold adjustment is  
457 nevertheless required, either for overcoming significant imbalance between different color channels or  
458 for the comparison between series of images obtained under considerably different staining and  
459 imaging conditions which are unavoidable, such as independent experimental repeats obtained in  
460 different time frames, with modified staining agent, different imaging settings, replaced lightning or  
461 optical components and so on.

462 To overcome this issue, we next suggest a simple adaptive threshold adjustment procedure that  
463 allows for an easy choice of the threshold value  $T$  for particular single cell sizes based on a single  
464 objective criterion. This procedure is performed once before running the analysis of a new image series  
465 given that the image parameters differ considerably from the previously analyzed one. The entire  
466 procedure is based on the multi-threshold analysis and calculation of empirical histograms of isolated  
467 objects sizes for every tested threshold value. These histograms are exemplified in Figs 11-13 for three  
468 representative microscopic images of both coccal and rod bacterial cell morphologies as well as for the  
469 eukaryotic cell lines, with raw images shown in panels A of respective figures. In all figures, panels B  
470 and C show the isolated objects belonging to a given size range after applying threshold  $T$  and cell size  
471 adjustment exemplified for the red and green color channels, respectively. In panel D, the upper (black)

472 curve gives the total area above the threshold  $T$ , which equals the sum of the lower (colored) curves  
473 representing the total area of isolated objects within a given size range.

474 Similarly, in panel E the upper (black) curve gives the total count of objects that appear isolated  
475 after threshold-based filtering for any given threshold value  $T$ , which equals the sum of the lower  
476 (colored) curves representing the total count of isolated objects within a given size range. Similar  
477 quantities for the green color channel are shown in panels F and G, respectively. These histograms are  
478 in direct correspondence to the key quantities used in our algorithm, since the ratio of the respective  
479 color curves gives us the effective single cell size, while the black curve in panel D divided by this  
480 effective cell size gives us the effective cell count. By comparing panels D vs E as well as F vs G one  
481 can see that the histograms exhibit similar shapes, thus indicating that their ratio is relatively stable,  
482 again confirming the robustness of our algorithm against moderate threshold imbalance. Furthermore,  
483 when black curves for both color channels (red and green) depicted in panels D and F decrease with  
484 increasing threshold  $T$  by the same functional form, such that their ratio is roughly constant at least  
485 within a certain threshold range, *any* chosen threshold  $T$  within this range would, by definition, lead to  
486 the same relative fractions of counted cells. Moreover, for a series of images, it is sufficient that this  
487 condition is fulfilled for all analyzed images in average. This shows explicitly why in the previous tests  
488 we obtained similar results for relative quantities for a wide range of threshold values  $T$ , while  
489 individual cell counts were in some cases overestimated for small and underestimated for large  
490 thresholds  $T$ , in comparison with manual count. Prominent exceptions from this rule can be observed in  
491 Fig 11, where pronounced color imbalance can be observed. In contrast, Figs 12 and 13 show that even  
492 under moderate color imbalance the above conditions are met to a certain extent.  
493



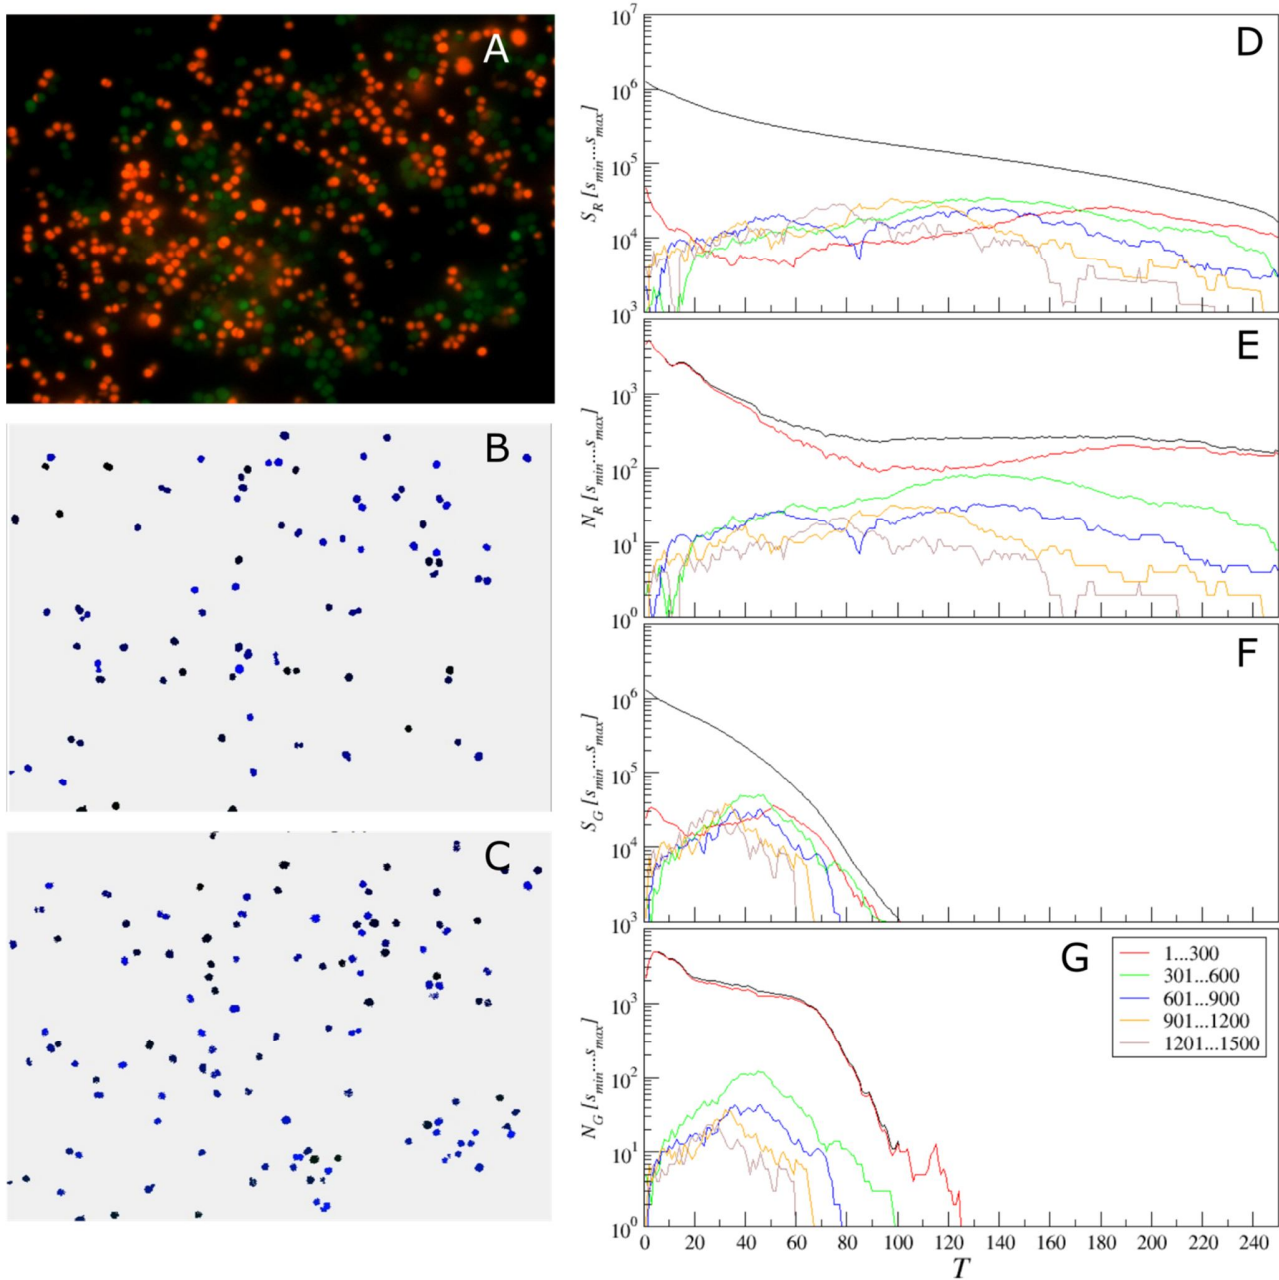

494  
495  
496  
497  
498  
499  
500  
501  
502  
503

**Fig 11. Adjustment of the threshold and single cell size balance for *S. aureus*.** (A) - the raw image, (B) and (C) – isolated objects belonging to a given size range between 301 and 600 pixels, exemplified for the red (with  $T = 140$ ) and the green (with  $T = 45$ ) color channels, respectively. (D, F) the black curve gives the total area above the threshold  $T$ , which is the sum of the lower (colored) curves that represent the total area of isolated objects within a given size range for the red (D) or the green channel (F). (E, G) the black curve gives the total count of objects that appear isolated after threshold-based filtering for any given threshold value  $T$ , which is the sum of the lower (colored) curves that represent the total count of isolated objects within a given size range for the red (D) or the green channel (F).

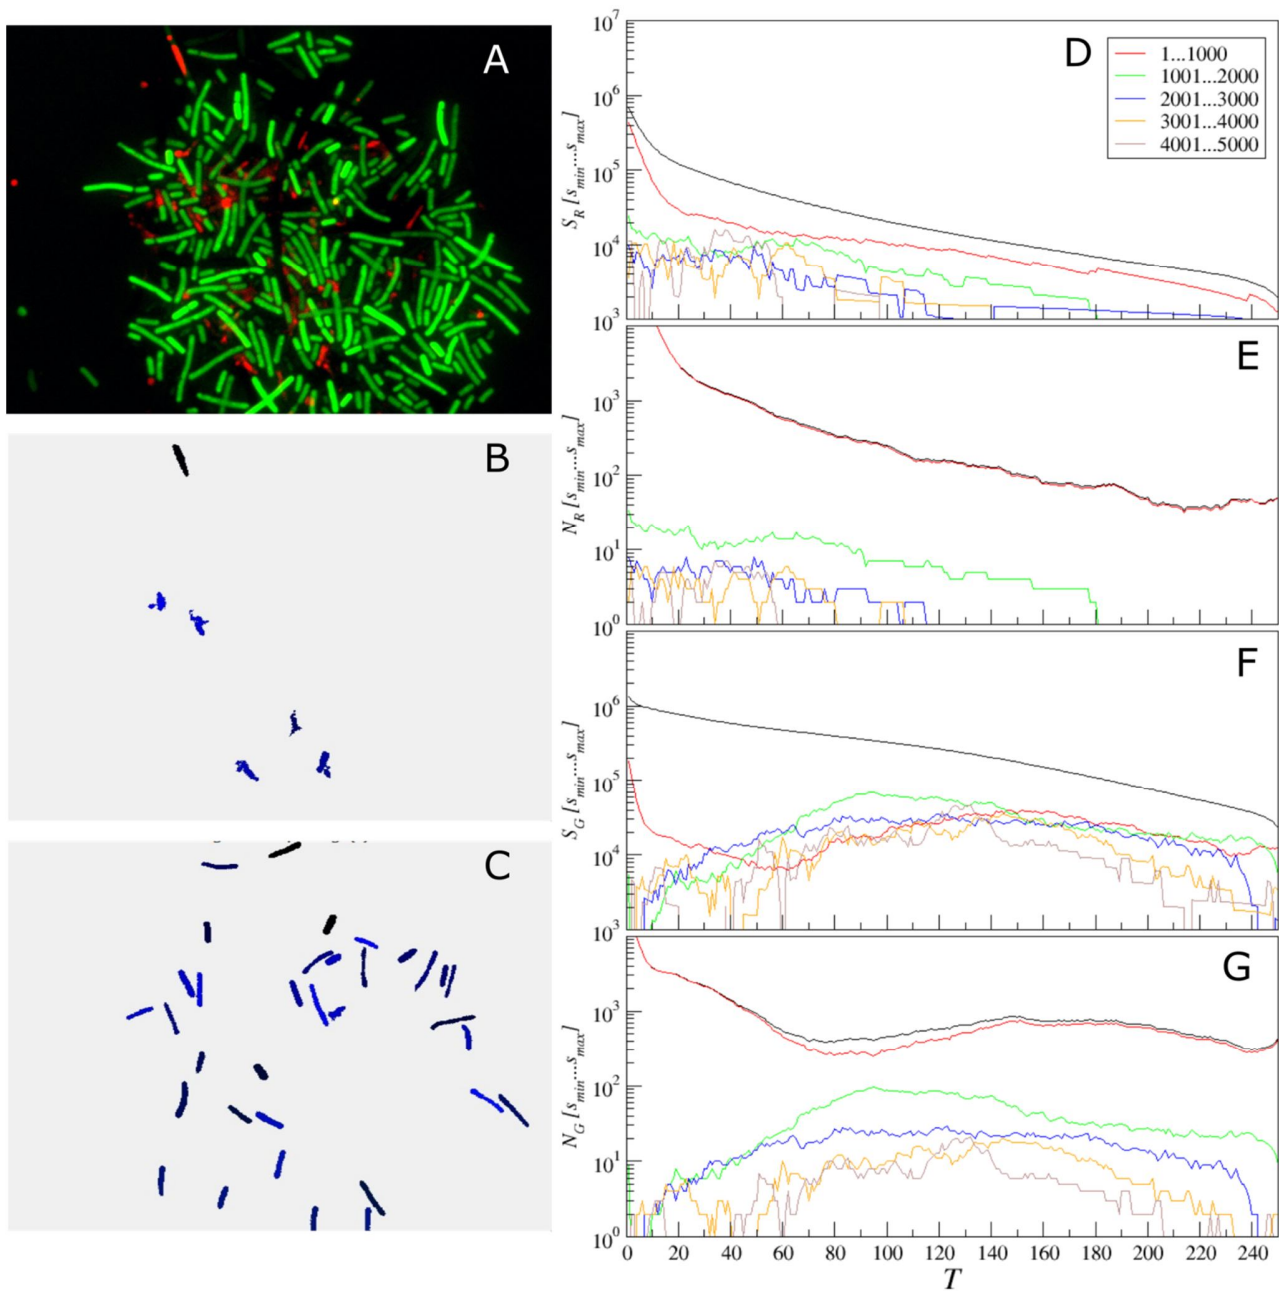

504  
505  
506  
507  
508  
509  
510  
511  
512  
513  
514

**Fig 12: Adjustment of the threshold and single cell size balance for *B. subtilis*.** (A) - the raw image, (B) and (C) – isolated objects belonging to a given size range between 1001 and 2000 pixels, exemplified for the red (with  $T = 70$ ) and the green (with  $T = 100$ ) color channels, respectively. (D, F) the black curve gives the total area above the threshold  $T$ , which is the sum of the lower (colored) curves that represent the total area of isolated objects within a given size range for the red (D) or the green channel (F). (E, G) the black curve gives the total count of objects that appear isolated after threshold-based filtering for any given threshold value  $T$ , which is the sum of the lower (colored) curves that represent the total count of isolated objects within a given size range for the red (D) or the green channel (F).

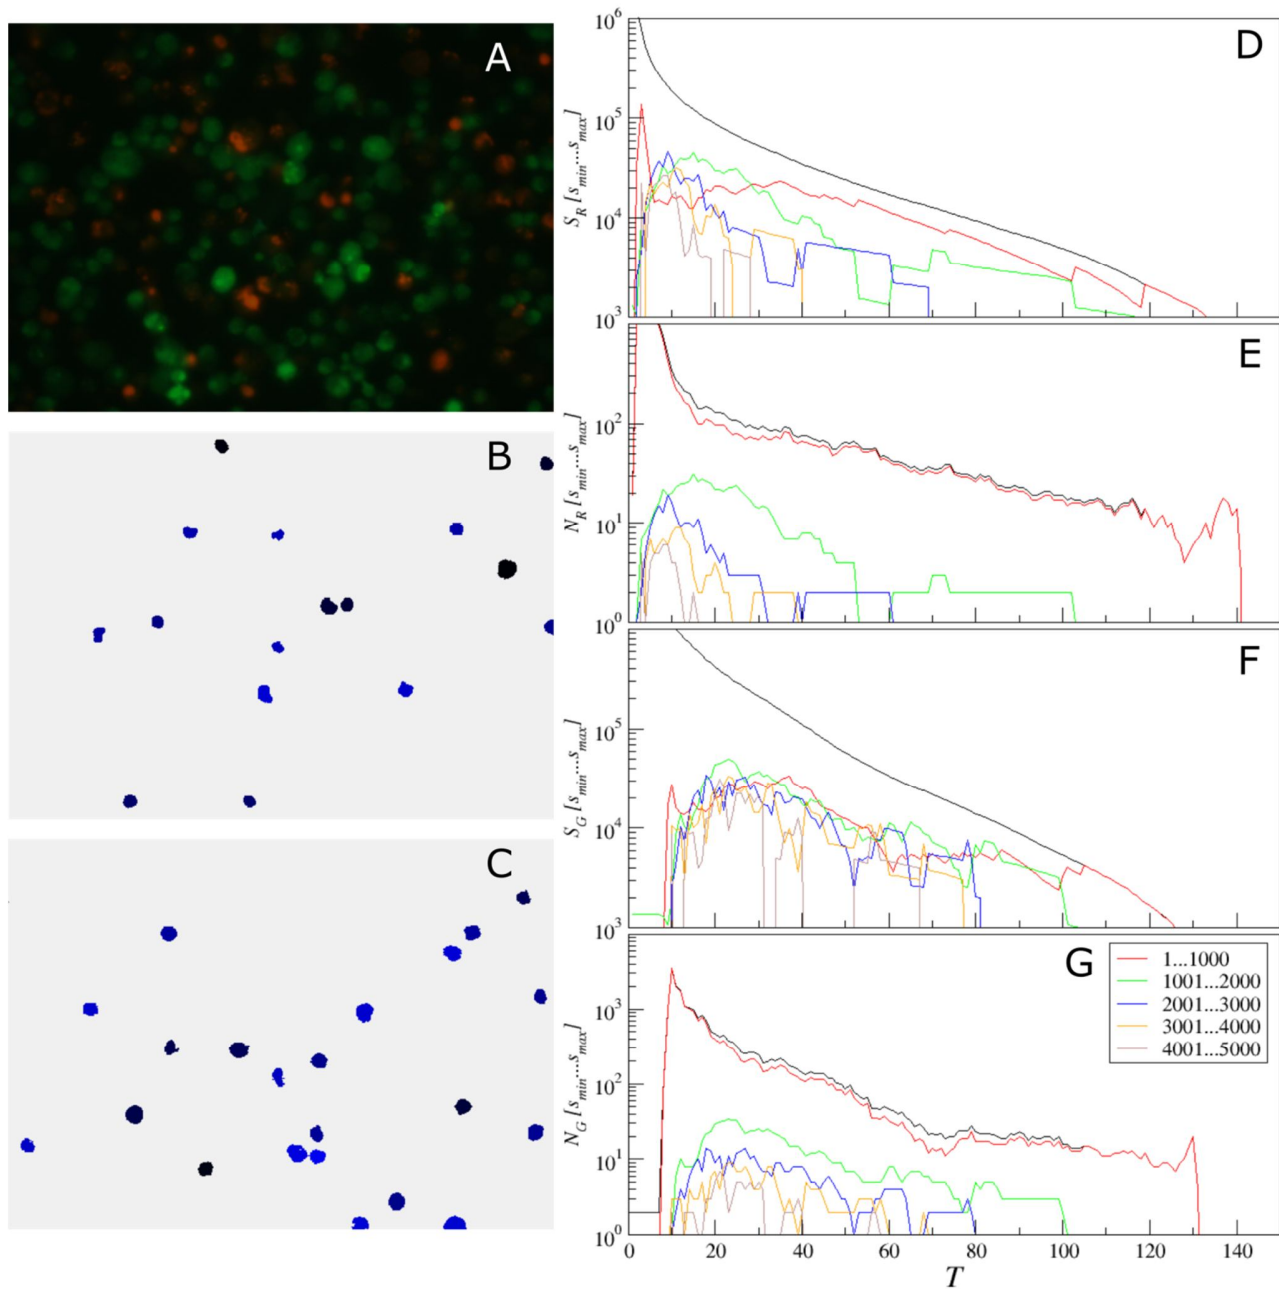

515  
 516 **Fig 13: Adjustment of the threshold and single cell size balance for eukaryotic cells.** (A) - the raw  
 517 image, (B) and (C) – isolated objects belonging to a given size range between 1001 and 2000 pixels,  
 518 exemplified for the red (with  $T = 15$ ) and the green (with  $T = 25$ ) color channels, respectively. (D, F)  
 519 the black curve gives the total area above the threshold  $T$ , which is the sum of the lower (colored)  
 520 curves that represent the total area of isolated objects within a given size range for the red (D) or the  
 521 green channel (F). (E, G) the black curve gives the total count of objects that appear isolated after  
 522 threshold-based filtering for any given threshold value  $T$ , which is the sum of the lower (colored)  
 523 curves that represent the total count of isolated objects within a given size range for the red (D) or the  
 524 green channel (F).  
 525

526 The figures also show that the overwhelming majority of isolated objects are small objects,  
527 which are below 300 pixels for coccal cells and below 1000 pixels for both rod and eukaryotic cells,  
528 respectively. Let us next focus on Figs 11D and 11E. In a marked contrast to the red curve for the small  
529 objects, histograms for larger sizes exhibit characteristic maxima, which are most pronounced in the  
530 green curve for the objects of sizes between 301 and 600 pixels. Assuming that the most common  
531 objects of similar size in the image except small noise bursts are single cells, we can choose the  
532 optimized threshold from the respective histogram maximum, which is around  $T = 140$ . For larger  
533 sizes, the blue histogram splits into two characteristic regimes with local maxima at around  $T = 55$  and  
534 130, respectively. This shows strong non-homogeneity of the objects that belong to this size that is  
535 untypical for single coccal cells, indicating that these are likely cell clusters. For larger sizes, the  
536 histograms of object counts are well below the green curve, indicating that objects of these sizes are  
537 less common than typical single cells, and significantly fluctuating due to the lack of statistics. Thus we  
538 next set the threshold  $T = 140$  and size range 301...600 and obtain the results of single cell selection  
539 depicted in panel B of Fig 11.

540 Now similar procedure can be easily repeated for the green channel. As one can see clearly  
541 from Figs 11F and 11G, while the green curve is again above the curves for larger sizes, due to the  
542 considerably lower intensity of the green channel, the optimal threshold values is now around  $T = 45$ .  
543 After the corresponding threshold adjustment, we obtain the typical examples of single cells depicted in  
544 Fig 11C.

545 Similar conclusions can be drawn from the analysis of Figs 12 and 13 for rod and eukaryotic  
546 cells, respectively. In both cases, following the same criterion based on finding the maximum of the  
547 histogram for the most common objects leads to reasonable selection of typical single cells, as  
548 indicated by panels B and C for the red and green channels, respectively.

549 Therefore, the suggested approach allows dealing with images obtained with considerable color  
550 imbalance as well as comparison of repeats obtained under different staining and imaging conditions  
551 that are sometimes unavoidable in routine lab practice, due to equipment and reagent aging, repairs,  
552 and replacements. Since all further analysis is based on the effective number of cells that is determined  
553 independently for each color channel with its own optimized threshold and single cell size values, the  
554 above adjustments do not affect any further stages of analysis.

555

## Conclusion

556

557

558 To summarize, our results indicate that the sub-population fraction estimates obtained from  
559 fluorescent-stained cells imaging data by *BioFilmAnalyzer* are very close to the results obtained by  
560 other techniques such as expert manual counting and flow cytometry. The two-step algorithm  
561 implemented in the *BioFilmAnalyzer* that normalizes the stained image area in the units of the effective  
562 single cell size that are determined following the suggested objective criterion while remaining under  
563 manual consistency control by the investigator performs largely independently of the cell shape and  
564 imaging conditions providing feasible results for cells aggregated in clusters. Moreover, it requires  
565 neither preliminary preparation nor filtering of raw images.

566 Thus, we suggest that the proposed algorithm implemented as the *BioFilmAnalyzer* software  
567 can be used for numerous applications. First, preliminary evaluation of cell counts and live/dead ratios  
568 can be quickly obtained without expertise in image processing. Second, the analysis of surface-  
569 adherent bacterial or eukaryotic cells without their resuspension and maintenance of the native  
570 distribution pattern on the surface is possible. Third, the quantification of cellular sub-populations from  
571 2d confocal layer images is also possible. Fourth, the software allows quantification of the cells sub-  
572 populations expressing fluorescent proteins during long-term incubation. Finally, because no further  
573 user intervention is required after few initial adjustment and cross-check procedures which usually take  
574 a couple of minutes using few representative images, further processing can be done over coffee-break  
575 by automated analysis of a series consisting up to 100 images.

576 We believe that the suggested algorithm and software would be useful in saving time and efforts  
577 in cells sub-population quantification from fluorescent microscopy data that is commonly required in  
578 various biomedical, biotechnological and pharmacological studies, especially for the analysis of  
579 biofilm-embedded cells where the performance of conventional techniques based on cell counting or  
580 flow cytometry is strongly limited. Both the algorithm and the *BioFilmAnalyzer* can be freely  
581 downloaded at <https://bitbucket.org/rogex/biofilmanalyzer/downloads/>, utilized and redistributed.

582

583

584

585

## 586 **References**

- 587 1. Tawakoli PN, Al-Ahmad A, Hoth-Hannig W, Hannig M, Hannig C. Comparison of different  
588 live/dead stainings for detection and quantification of adherent microorganisms in the initial oral  
589 biofilm. *Clinical Oral Investigations*. 2013;17(3):841-50. doi: 10.1007/s00784-012-0792-3. PubMed  
590 PMID: WOS:000316749300019.
- 591 2. McMullan BJ, Desmarini D, Djordjevic JT, Chen SCA, Roper M, Sorrell TC. Rapid  
592 Microscopy and Use of Vital Dyes: Potential to Determine Viability of *Cryptococcus neoformans* in the  
593 Clinical Laboratory. *Plos One*. 2015;10(1). doi: 10.1371/journal.pone.0117186. PubMed PMID:  
594 WOS:000348821400028.
- 595 3. Atale N, Gupta S, Yadav UCS, Rani V. Cell-death assessment by fluorescent and nonfluorescent  
596 cytosolic and nuclear staining techniques. *Journal of Microscopy*. 2014;255(1):7-19. doi:  
597 10.1111/jmi.12133. PubMed PMID: WOS:000339710500002.
- 598 4. Netuschil L, Auschill TM, Sculean A, Arweiler NB. Confusion over live/dead stainings for the  
599 detection of vital microorganisms in oral biofilms - which stain is suitable? *Bmc Oral Health*. 2014;14.  
600 doi: 10.1186/1472-6831-14-2. PubMed PMID: WOS:000330071900001.
- 601 5. Gerstner AOH, Mittag A, Laffers W, Dahnert I, Lenz D, Bootz F, et al. Comparison of  
602 immunophenotyping by slide-based cytometry and by flow cytometry. *Journal of Immunological*  
603 *Methods*. 2006;311(1-2):130-8. doi: 10.1016/j.jim.2006.01.012. PubMed PMID:  
604 WOS:000237527200013.
- 605 6. Mital J, Schwarz J, Taatjes DJ, Ward GE. Laser scanning cytometer-based assays for measuring  
606 host cell attachment and invasion by the human pathogen *Toxoplasma gondii*. *Cytometry Part A*.  
607 2006;69A(1):13-9. doi: 10.1002/cyto.a.20202. PubMed PMID: WOS:000234383700002.
- 608 7. Adan A, Alizada G, Kiraz Y, Baran Y, Nalbant A. Flow cytometry: basic principles and  
609 applications. *Critical Reviews in Biotechnology*. 2017;37(2):163-76. doi:  
610 10.3109/07388551.2015.1128876. PubMed PMID: WOS:000392639500003.
- 611 8. van der Pol E, Hoekstra AG, Sturk A, Otto C, van Leeuwen TG, Nieuwland R. Optical and non-  
612 optical methods for detection and characterization of microparticles and exosomes. *Journal of*  
613 *Thrombosis and Haemostasis*. 2010;8(12):2596-607. doi: 10.1111/j.1538-7836.2010.04074.x. PubMed  
614 PMID: WOS:000285110700003.
- 615 9. Heydorn A, Nielsen AT, Hentzer M, Sternberg C, Givskov M, Ersboll BK, et al. Quantification  
616 of biofilm structures by the novel computer program COMSTAT. *Microbiology-Sgm*. 2000;146:2395-  
617 407. PubMed PMID: WOS:000089985400007.

- 618 10. Beyenal H, Donovan C, Lewandowski Z, Harkin G. Three-dimensional biofilm structure  
619 quantification. *Journal of Microbiological Methods*. 2004;59(3):395-413. doi:  
620 10.1016/j.mimet.2004.08.003. PubMed PMID: WOS:000224843300009.
- 621 11. Merritt JH, Kadouri DE, O'Toole GA. Growing and analyzing static biofilms. *Curr Protoc*  
622 *Microbiol*. 2005;Chapter 1:Unit 1B. doi: 10.1002/9780471729259.mc01b01s00. PubMed PMID:  
623 18770545; PubMed Central PMCID: PMCPMC4568995.
- 624 12. Ji L, Piper J, Tang JY. EROSION AND DILATION OF BINARY IMAGES BY ARBITRARY  
625 STRUCTURING ELEMENTS USING INTERVAL CODING. *Pattern Recognition Letters*.  
626 1989;9(3):201-9. doi: 10.1016/0167-8655(89)90055-x. PubMed PMID: WOS:A1989U514000008.
- 627 13. Adams R, Bischof L. SEEDED REGION GROWING. *Ieee Transactions on Pattern Analysis*  
628 *and Machine Intelligence*. 1994;16(6):641-7. doi: 10.1109/34.295913. PubMed PMID:  
629 WOS:A1994NR97200008.
- 630 14. Nattkemper TW, Twellmann T, Ritter H, Schubert W. Human vs. machine: evaluation of  
631 fluorescence micrographs. *Computers in Biology and Medicine*. 2003;33(1):31-43. doi: 10.1016/s0010-  
632 4825(02)00060-4. PubMed PMID: WOS:000180493700003.
- 633 15. Tchoukalova YD, Harteneck DA, Karwoski RA, Tarara J, Jensen MD. A quick, reliable, and  
634 automated method for fat cell sizing. *Journal of Lipid Research*. 2003;44(9):1795-801. doi:  
635 10.1194/jlr.D300001-JLR200. PubMed PMID: WOS:000185522300024.
- 636 16. Daims H, Lucker S, Wagner M. daime, a novel image analysis program for microbial ecology  
637 and biofilm research. *Environmental Microbiology*. 2006;8(2):200-13. doi: 10.1111/j.1462-  
638 2920.2005.00880.x. PubMed PMID: WOS:000234647600003.
- 639 17. Lempitsky V, Rother C, Roth S, Blake A. Fusion Moves for Markov Random Field  
640 Optimization. *Ieee Transactions on Pattern Analysis and Machine Intelligence*. 2010;32(8):1392-405.  
641 doi: 10.1109/tpami.2009.143. PubMed PMID: WOS:000278858600004.
- 642 18. Klinger-Strobel M, Suesse H, Fischer D, Pletz MW, Makarewicz O. A Novel Computerized Cell  
643 Count Algorithm for Biofilm Analysis. *Plos One*. 2016;11(5). doi: 10.1371/journal.pone.0154937.  
644 PubMed PMID: WOS:000375676800095.
- 645 19. Kayumov AR, Nureeva AA, Trizna EY, Gazizova GR, Bogachev MI, Shtyrlin NV, et al. New  
646 Derivatives of Pyridoxine Exhibit High Antibacterial Activity against Biofilm-Embedded  
647 *Staphylococcus* Cells. *Biomed Research International*. 2015;10. doi: 10.1155/2015/890968. PubMed  
648 PMID: WOS:000367944100001.
- 649 20. Trizna EY, Khakimullina EN, Latypova LZ, Kurbangalieva AR, Sharafutdinov IS, Evtyugin

- 650 VG, et al. Thio Derivatives of 2(5H)-Furanone As Inhibitors against *Bacillus subtilis* Biofilms. *Acta*  
651 *Naturae*. 2015;7(2):102-7. PubMed PMID: WOS:000355757100013.
- 652 21. Trizna E, Latypova L, Kurbangalieva A, Bogachev MI, Kayumov A. 2(5H)-Furanone  
653 Derivatives as Inhibitors of Staphylococcal Biofilms. *Bionanoscience*. 2016;6(4):423-6. doi:  
654 10.1007/s12668-016-0258-1. PubMed PMID: WOS:000390587700036.
- 655 22. Baidamshina DR, Trizna EY, Holyavka MG, Bogachev MI, Artyukhov VG, Akhatova FS, et al.  
656 Targeting microbial biofilms using Ficin, a nonspecific plant protease. *Scientific Reports*. 2017;7. doi:  
657 10.1038/srep46068. PubMed PMID: WOS:000398641900002.
- 658 23. Sharafutdinov IS, Trizna EY, Baidamshina DR, Ryzhikova MN, Sibgatullina RR,  
659 Khabibrakhmanova AM, et al. Antimicrobial Effects of Sulfonyl Derivative of 2(5&ITH&IT)-Furanone  
660 against Planktonic and Biofilm Associated Methicillin-Resistant and -Susceptible&IT *Staphylococcus*  
661 *aureus*&IT. *Frontiers in Microbiology*. 2017;8. doi: 10.3389/fmicb.2017.02246. PubMed PMID:  
662 WOS:000415670800001.
- 663 24. Abramoff MD, Magalhães PJ, Ram SJ. Image processing with ImageJ2004; 11(7):[36-42 pp.].
- 664 25. Selinummi J, Seppala J, Yli-Harja O, Puhakka JA. Software for quantification of labeled  
665 bacteria from digital microscope images by automated image analysis. *Biotechniques*. 2005;39(6):859-  
666 63. doi: 10.2144/000112018. PubMed PMID: WOS:000234104900011.

667  
668

## 669 **Supporting information**

- 670 **BioFilmAnalyser.exe. Software module for Win32 (2000/XP and higher).** A software tool for semi-  
671 automatic processing of fluorescent microscopic images especially designed to overcome typical limitations  
672 of standard image analysis software under biofilm research conditions. Can be downloaded from  
673 <https://bitbucket.org/rogex/biofilmanalyzer/downloads/>
- 674 **BioFilmAnalyzer\_User\_Manual.pdf. The user manual.** Can be downloaded from  
675 <https://bitbucket.org/rogex/biofilmanalyzer/downloads/>

676
